# Supplementary material for: Three-component reaction between substituted 2-(2-nitrovinyl)-phenols, acetylenedicarboxylate and amines: diversity-oriented synthesis of novel pyrrolo[3,4-c]coumarins
Source: Royal Society of Chemistry journal article supplement (doi:10.1039/c5ra23392e), 2015-12-21
Supplement: c5ra23392e1.pdf [file c5ra23392e1.pdf]

# Three-Component Reaction between Substituted 2-(2-Nitrovinyl)-phenols, Acetylenedicarboxylate and Amines: Diversity-Oriented Synthesis of Novel Pyrrolo[3,4-c]coumarins

Shuwen Xue,<sup>a</sup> Juan Yao,<sup>a</sup> Jiaming Liu,<sup>a</sup> Lizhong Wang,<sup>b</sup>

Xinyu Liu<sup>a</sup> and Cunde Wang<sup>\*a</sup>

<sup>a</sup>*School of Chemistry and Chemical Engineering, Yangzhou University, 180 Siwangting Street, Yangzhou 225002, P. R. China. Fax: +86-514-8797-5244; Tel: +86-514-8797-5568; E-mail: [wangcd@yzu.edu.cn](mailto:wangcd@yzu.edu.cn)*

<sup>b</sup>*Department of Environmental and Chemical Engineering, Taizhou Polytechnic College, Taizhou 225300, P. R. China*

## CONTENTS

|                                                                                       |     |
|---------------------------------------------------------------------------------------|-----|
| 1. Experimental Section, General.....                                                 | S2  |
| 2. General procedure for preparation of pyrrolo[3,4-c]coumarins ( <b>4a-4q</b> )..... | S2  |
| 3. Spectroscopic data of the products <b>4a-4q</b> .....                              | S3  |
| 4. Copies of NMR Spectroscopies.....                                                  | S10 |
| 5 X-ray Structure of <b>4a</b> and <b>4o</b> .....                                    | S27 |

## Experimental section

All melting points were determined in a Yanaco melting point apparatus and are uncorrected. IR spectra were recorded in a Nicolet FT-IR 5DX spectrometer. The  $^1\text{H}$  NMR (400 MHz) and  $^{13}\text{C}$  NMR (100 MHz) spectra were recorded in a Bruker AV-400 spectrometer with TMS as internal reference in  $\text{CDCl}_3$  solutions. The  $J$  values are given in hertz. Only discrete or characteristic signals for the  $^1\text{H}$  NMR are reported. The MS spectra were obtained on a ZAB-HS mass spectrometer with 70 eV. X-ray crystallographic analysis was performed with a SMART APEX-II diffractometer. Flash chromatography was performed on silica gel (230-400 mesh) eluting with ethyl acetate-hexanes mixture. All reactions were monitored by thin layer chromatography (TLC). All reagents and solvents were purchased from commercial sources and purified commonly before used.

### **General procedure for preparation of pyrrolo[3,4-*c*]coumarins 4a-q**

The standard procedure for the synthesis of pyrrolo[3,4-*c*]coumarins via three-component reaction between substituted 2-(2-nitrovinyl)phenols, acetylenedicarboxylate and amines is as follows. To the mixture of substituted 2-(2-nitrovinyl)-phenol **1a-e** (1 mmol), acetylenedicarboxylate (213 mg, 1.5 mmol), and amines **3a-g** (1 mmol) in toluene (5 mL) was added  $\text{FeCl}_3$  (65 mg, 0.4 mmol). The resulting mixture was stirred at 110 °C for 6 h, and the completion of reaction was confirmed by TLC (Hexanes/EtOAc, 5:1). Subsequently, the solvent was removed by reduced pressure, the residues was added with water (10 mL) and was extracted with ethyl acetate (10 mL X 2). The organic phase was washed with water (10 mL) and brine (5 mL), and dried over anhydrate sodium sulfate. After removal of dichloromethane, the crude product was purified by flash chromatography (silica gel, EtOAc/hexanes, 1/8) to give the desirable products,

**Methyl 2-benzyl-4-oxo-2,4-dihydrochromeno[3,4-c]pyrrole-3-carboxylate (4a)**

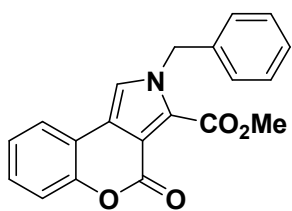

Yellow solid yield 90%, m.p. 196.3 °C; <sup>1</sup>H NMR (400 MHz, CDCl<sub>3</sub>) δ (ppm): 7.59 (d, *J* = 7.6 Hz, 1H), 7.32 (t, *J* = 7.2 Hz, 3H), 7.36 (d, 1H), 7.30 (t, *J* = 3.2 Hz, 2H), 7.18 (d, *J* = 6.8 Hz, 2H), 7.16 (s, 1H), 5.59 (s, 2H), 3.95 (s, 3H); <sup>13</sup>C NMR (CDCl<sub>3</sub>, 100 MHz) δ (ppm): 161.0, 156.4, 151.3, 135.9, 135.9, 129.4, 128.6, 128.0, 127.6, 126.9, 124.3, 123.6, 122.8, 122.3, 119.1, 118.2, 117.6, 116.9, 115.5, 53.4, 52.7; IR (KBr, cm<sup>-1</sup>): 1745, 1689, 1580, 1497, 1289, 1167, 813, 728; MS (EI): *m/z* = 334.40 [(M+1)<sup>+</sup>].

**Methyl 2-benzyl-8-bromo-4-oxo-2,4-dihydrochromeno[3,4-c]pyrrole-3-carboxylate (4b)**

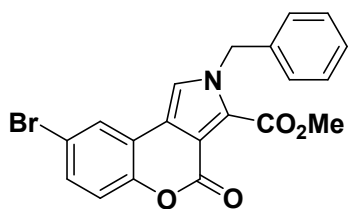

Yellow solid yield 88%, m.p. 220.6 °C; <sup>1</sup>H NMR (400 MHz, CDCl<sub>3</sub>) δ (ppm): 7.70 (s, 1H), 7.39 (d, *J* = 8.8 Hz, 1H), 7.39 (d, *J* = 8.8 Hz, 3H), 7.25 (s, 1H), 7.17 (t, *J* = 8.8 Hz, 3H), 5.58 (s, 2H), 3.95 (s, 3H); <sup>13</sup>C NMR (CDCl<sub>3</sub>, 100 MHz) δ (ppm): 160.8, 155.7, 150.2, 135.6, 131.3, 130.6, 129.4, 128.7, 128.2, 127.8, 127.1, 125.4, 121.4, 119.3, 118.4, 116.6, 110.8, 53.5, 52.84; IR (KBr, cm<sup>-1</sup>): 1762, 1691, 1600, 1510, 1279, 1200, 839, 756; MS (EI): *m/z* = 412.50 [(M+1)<sup>+</sup>].

**Methyl 2-benzyl-6-methyl-4-oxo-2,4-dihydrochromeno[3,4-c]pyrrole-3-carboxylate (4c)**

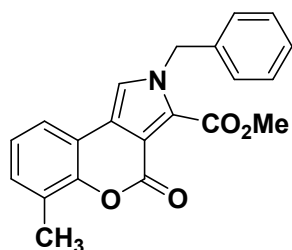

Yellow solid yield 62%, m.p. 210.4 °C <sup>1</sup>H NMR (400 MHz, CDCl<sub>3</sub>) δ (ppm): 7.42 (d, 1H), 7.32 (t, *J* = 7.2 Hz, 2H), 7.25 (s, 1H), 7.17 (d, *J* = 6.4 Hz, 3H), 7.07 (t, *J* = 7.6 Hz, 2H), 5.59 (s, 2H), 3.94 (s, 3H), 2.44 (s, 3H); <sup>13</sup>C NMR (CDCl<sub>3</sub>, 100 MHz) δ (ppm): 161.1, 156.4, 149.7, 136.0, 129.7, 129.0, 128.3, 127.3, 126.6, 123.5, 120.1, 118.8, 115.2, 111.3, 53.4, 52.6, 16.2; IR (KBr, cm<sup>-1</sup>): 1786, 1685, 1597, 1498, 1272, 1225, 828, 749; MS (EI): *m/z* = 348.4[(M+1)<sup>+</sup>].

**Methyl 2-benzyl-8-chloro-4-oxo-2,4-dihydrochromeno[3,4-c]pyrrole-3-carboxylate**

**te (4d)**

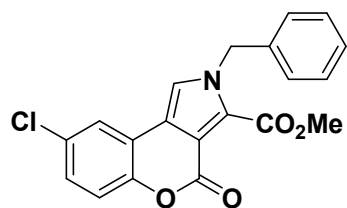

Yellow solid yield 92%, m.p. 200.3 °C <sup>1</sup>H NMR (400 MHz, DMSO-d<sub>6</sub>) δ (ppm): 8.16 (s, 1H), 8.03 (s, 1H), 7.36 (d, *J* = 7.2Hz, 1H), 7.34 (t, *J* = 5.6 Hz, 3H), 7.30 (d, *J* = 7.6 Hz, 1H), 7.20 (d, *J* = 6.4 Hz, 2H), 5.55 (s, 2H), 3.80 (s, 3H); <sup>13</sup>C NMR (CDCl<sub>3</sub>, 100 MHz) δ (ppm): 160.7, 155.4, 149.7, 137.1, 129.2, 128.7, 128.5, 128.3, 127.7, 124.9, 123.2, 121.9, 120.7, 119.0, 117.7, 109.9, 53.1, 52.9; IR (KBr, cm<sup>-1</sup>): 1745, 1687, 1547, 1502, 1300, 1256, 870, 739; MS (EI): *m/z* = 368.30 [(M+1)<sup>+</sup>].

**Methyl 2-(benzyl)-8-fluoro-4-oxo-2,4-dihydrochromeno[3,4-c]pyrrole-3-carboxylate (4e)**

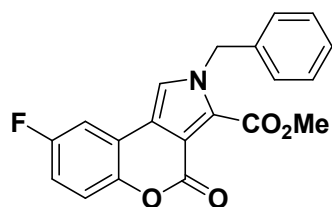

Yellow solid yield 80%, m.p. 198.5 °C <sup>1</sup>H NMR (400 MHz, CDCl<sub>3</sub>) δ (ppm): 7.69 (s, 1H), 7.40 (dt, *J*<sub>1</sub> = 2.0 Hz, *J*<sub>2</sub> = 8.8Hz, 1H), 7.26 (d, *J* = 2.4 Hz, 1H), 7.25 (d, *J* = 2.4 Hz, 1H), 7.18 (td, *J*<sub>1</sub> = 8.0 Hz, *J*<sub>2</sub> = 2.0 Hz, 3H), 7.18 (td, *J*<sub>1</sub> = 8.4 Hz, *J*<sub>2</sub> = 1.6 Hz, 2H), 5.54 (s, 2H), 3.96 (s, 3H); <sup>13</sup>C NMR (CDCl<sub>3</sub>, 100 MHz) δ (ppm): 161.4 (d, *J* = 222.4 Hz), 160.8 (d, *J* = 222.4 Hz), 155.6, 150.2, 131.4 (d, *J* = 12.4 Hz), 131.1 (d, *J* = 12.4 Hz), 129.4 (d, *J* = 32.8 Hz), 129.3 (d, *J* = 32.8 Hz), 125.2, 121.5, 118.9, 118.7, 117.3, 116.6, 116.2, 115.9, 52.9, 52.8; IR (KBr, cm<sup>-1</sup>): 1770, 1673, 1582, 1490, 1280, 1189, 834, 740; MS (EI): *m/z* = 351.0 [(M+1)<sup>+</sup>].

**Methyl 2-(4-fluorobenzyl)-8-bromo-4-oxo-2,4-dihydrochromeno[3,4-c]pyrrole-3-carboxylate (4f)**

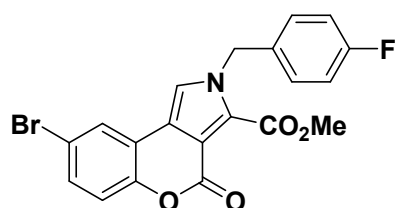

Yellow solid yield 78%, m.p. 240.1 °C <sup>1</sup>H NMR (400 MHz, CDCl<sub>3</sub>) δ (ppm): 7.36 (d, *J* = 6.0 Hz, 1H), 7.36 (d, *J* = 6.4 Hz, 2H), 7.25 (s, 1H), 7.24 (d, *J* = 4.4 Hz, 2H), 7.16 (d, *J* = 6.8 Hz, 2H), 7.02 (td, *J*<sub>1</sub> = 9.2 Hz, *J*<sub>2</sub> = 2.8 Hz, 1H), 5.57 (s, 2H), 3.94 (s, 3H); <sup>13</sup>C NMR (CDCl<sub>3</sub>, 100 MHz) δ (ppm): 160.9 (d, *J* = 332.0 Hz), 159.9 (d, *J* = 332.0 Hz), 157.6, 155.9, 147.4 (d, *J* = 8.8 Hz), 135.7, 129.1, 128.5, 127.4, 121.

9, 118.9, 118.7 (d,  $J = 34.8$  Hz), 116.6, 116.5, 115.4 (d,  $J = 96.4$  Hz), 108.6 (d,  $J = 98.0$  Hz), 53.5, 52.7; IR (KBr,  $\text{cm}^{-1}$ ): 1767, 1681, 1562, 1505, 1295, 1200, 870, 739; MS (EI):  $m/z = 432.30$   $[(M+2)^+]$ .

**Methyl 2-(4-fluorobenzyl)-4-oxo-2,4-dihydrochromeno[3,4-c]pyrrole-3-carboxylate (4g)**

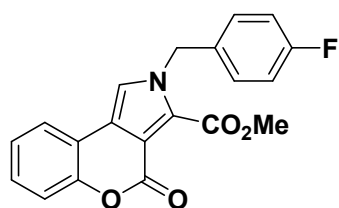

Yellow solid yield 86%, m.p. 199.2 °C  $^1\text{H}$  NMR (400 MHz,  $\text{CDCl}_3$ )  $\delta$  (ppm): 7.59 (d,  $J = 8\text{Hz}$ , 1H), 7.32 (d,  $J = 8.8$  Hz, 1H), 7.21 (dd,  $J_2 = 6.4$  Hz,  $J_2 = 1.6$  Hz, 2H), 7.18 (t,  $J = 5.2\text{Hz}$ , 2H), 7.05-7.05 (d,  $J = 8.4$  Hz, 2H), 7.01 (s, 1H), 5.55 (s, 2H), 3.94 (s, 3H);  $^{13}\text{C}$  NMR ( $\text{CDCl}_3$ , 100 MHz)  $\delta$  (ppm): 161.3, 161.0, 156.5 (d,  $J = 200.0$  Hz), 151.2, 131.7, 129.5, 128.0, 124.6, 124.4, 123.7, 122.8 (d,  $J = 12$  Hz), 122.3 (d,  $J = 12$  Hz), 119.0, 118.2, 116.9 (d,  $J = 25$  Hz), 116.3, 116.1, 111.2 (d,  $J = 11$  Hz), 53.7, 52.6 IR (KBr,  $\text{cm}^{-1}$ ): 1789, 1696, 1600, 1527, 1279, 1186, 829, 728; MS (EI):  $m/z = 351.0$   $[(M+1)^+]$ .

**Methyl 2-(4-methoxyphenyl)-4-oxo-2,4-dihydrochromeno[3,4-c]pyrrole-3-carboxylate (4h)**

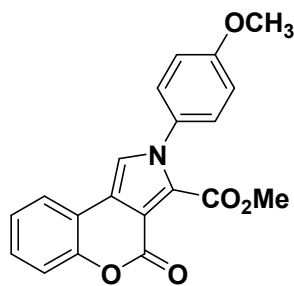

Yellow solid yield 75%, m.p. 79.0 °C  $^1\text{H}$  NMR (400 MHz,  $\text{CDCl}_3$ )  $\delta$  (ppm): 7.62(d,  $J = 7.6$  Hz, 1H), 7.33 (s, 1H), 7.31 (d,  $J = 6.0$  Hz, 3H), 7.27 (t,  $J = 8.0$  Hz, 1H), 7.19 (t,  $J = 7.6$  Hz, 1H), 6.95 (d,  $J = 8.8$  Hz, 2H), 3.84 (s, 3H), 3.81 (s, 3H);  $^{13}\text{C}$  NMR ( $\text{CDCl}_3$ , 100 MHz)  $\delta$  (ppm): 160.7, 156.7, 131.8, 128.7, 128.0, 126.9, 126.3, 124.5, 123.8, 122.9, 122.4, 119.3, 118.4, 117.7, 117.0, 115.6, 114.5, 110.8, 55.5, 52.7. IR (KBr,  $\text{cm}^{-1}$ ): 1790, 1682, 1584, 1535, 1286, 1250, 867, 745; MS (EI):  $m/z = 350.50$   $[(M+1)^+]$ .

**Methyl 8-chloro-2-(4-methoxyphenyl)-4-oxo-2,4-dihydrochromeno[3,4-c]pyrrole-3-carboxylate (4i)**

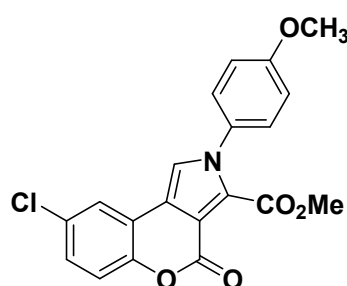

Yellow solid yield 74%, m.p. 93.2 °C  $^1\text{H}$  NMR (400 MHz,  $\text{CDCl}_3$ )  $\delta$  (ppm): 7.62 (d,  $J = 7.6$  Hz, 1H), 7.33 (s, 1H), 7.31 (d,  $J = 6.0$  Hz, 3H), 7.27 (t,  $J = 8.0$  Hz, 1H), 7.19 (t,  $J = 7.6$  Hz, 1H), 6.95 (d,  $J = 8.8$  Hz, 2H), 3.84 (s, 3H), 3.81 (s, 3H);  $^{13}\text{C}$  NMR ( $\text{CDCl}_3$ , 100 MHz)  $\delta$  (ppm): 160.7, 156.7, 131.8, 128.7, 128.0, 126.9, 126.3, 124.5, 123.8, 122.9, 122.4, 119.3, 118.4, 117.7, 117.0, 115.6, 114.5, 110.8, 55.5, 52.7. IR (KBr,  $\text{cm}^{-1}$ ): 1790, 1682, 1584, 1535, 1286, 1250, 867, 745; MS (EI):  $m/z = 366.0$   $[(M+1)^+]$ .

00 MHz, CDCl<sub>3</sub>)  $\delta$  (ppm): 7.60 (d,  $J$  = 2.0 Hz, 1H), 7.33 (d,  $J$  = 1.3Hz, 1H), 7.30 (d,  $J$  = 8.8 Hz, 2H), 7.28 (d,  $J$  = 2.0 Hz, 1H), 7.26 (d,  $J$  = 2.0 Hz, 1H), 6.99 (s, 1H), 6.97 (s, 1H), 3.86 (s, 3H), 3.83 (s, 3H); <sup>13</sup>C NMR (CDCl<sub>3</sub>, 100 MHz)  $\delta$  (ppm): 160.5, 156.1, 131.6, 129.3, 128.6, 127.9, 126.9, 126.7, 122.6, 122.1, 119.5, 118.7, 117.0, 115.2, 114.6, 110.5, 55.7, 52.9; IR (KBr, cm<sup>-1</sup>): 1778, 1669, 1587, 1547, 1296, 1230, 840, 754; MS (EI):  $m/z$  = 384.40 [(M+1)<sup>+</sup>].

**Methyl 8-bromo-4-oxo-2-m-tolyl-2,4-dihydrochromeno[3,4-c]pyrrole-3-carboxylate (4j)**

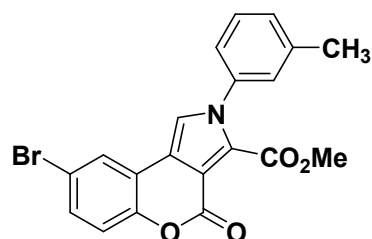

Yellow solid yield 65%, m.p. 89.7°C <sup>1</sup>H NMR (400 MHz, CDCl<sub>3</sub>)  $\delta$  (ppm): 8.88 (d,  $J$  = 2.4 Hz, 1H), 8.04 (s, 1H), 7.75 (d,  $J$  = 8.4 Hz, 1H), 7.70 (dd,  $J_1$  = 2.4 Hz,  $J_2$  = 8.4 Hz, 2H), 7.53 (dd,  $J_1$  = 1.2 Hz,  $J_2$  = 8.8 Hz, 2H), 7.26 (d,  $J$  = 8.8 Hz, 1H), 4.17 (s, 3H), 2.64 (s, 3H); <sup>13</sup>C NMR (CDCl<sub>3</sub>, 100 MHz)  $\delta$  (ppm): 167.0, 159.4, 151.3, 151.1, 148.2, 145.5, 144.6, 135.3, 131.2, 128.8, 128.0, 125.9, 122.1, 120.9, 119.1, 118.1, 110.3, 53.7, 22.4; IR (KBr, cm<sup>-1</sup>): 1771, 1670, 1590, 1550, 1286, 1249, 867, 762; MS (EI):  $m/z$  = 414.0 [(M+3)<sup>+</sup>].

**Methyl 8-bromo-2-octyl-4-oxo-2,4-dihydrochromeno[3,4-c]pyrrole-3-carboxylate (4k)**

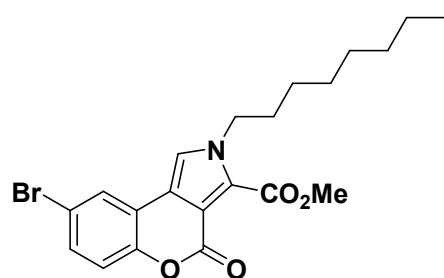

Yellow solid yield 55%, m.p. 78.6 °C <sup>1</sup>H NMR (400 MHz, CDCl<sub>3</sub>)  $\delta$  (ppm): 7.71 (d,  $J$  = 2.4 Hz, 1H), 7.37 (dd,  $J_1$  = 2.4 Hz,  $J_2$  = 8.8 Hz, 1H), 7.25 (s, 1H), 7.15 (dt,  $J_1$  = 6.4 Hz,  $J_2$  = 3.6 Hz, 1H), 4.34 (t,  $J$  = 7.2 Hz, 2H), 3.98 (s, 3H), 1.23 (m, 12H), 0.84 (t,  $J$  = 6.4 Hz, 3H); <sup>13</sup>C NMR (CDCl<sub>3</sub>, 100 MHz)  $\delta$  (ppm): 160.8, 155.9, 150.1, 130.8, 128.8, 125.1, 124.7, 121.1, 118.9, 118.7, 117.6, 116.6, 52.7, 50.6, 31.7, 31.6, 29.1, 29.0, 26.5, 22.6, 14.08; IR (KBr, cm<sup>-1</sup>): 1784, 1686, 1600, 1592, 1290, 1256, 890, 742; MS (EI):  $m/z$  = 436.4 [(M+3)<sup>+</sup>].

**Methyl 2-octyl-4-oxo-2,4-dihydrochromeno[3,4-c]pyrrole-3-carboxylate (4l)**

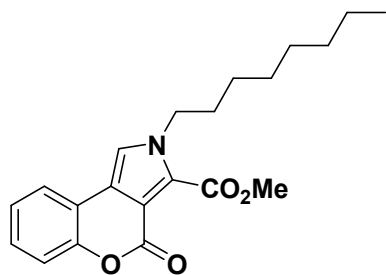

Yellow solid yield 58%, m.p. 76.2°C <sup>1</sup>H NMR (400 MHz, CDCl<sub>3</sub>) δ (ppm): 7.57 (d, *J* = 8Hz, 1 H), 7.25-7.24 (m, 3H), 7.16 (td, *J*<sub>1</sub> = 8.0 Hz, *J*<sub>2</sub> = 2.0 Hz, 1H), 4.32 (t, *J* = 7.2 Hz, 2H), 3.97 (s, 3H), 1.27-1.22 (m, 12H), 0.83 (t, *J* = 6.4 Hz, 3H);

<sup>13</sup>C NMR (CDCl<sub>3</sub>, 100 MHz) δ (ppm): 161.0, 156.4, 151.2, 128.0, 124.2, 123.9, 122.4, 122.3, 118.4, 117.1, 115.7, 110.7, 52.5, 50.5, 31.7, 29.1, 29.0, 26.6, 2.6, 14.1; IR (KBr, cm<sup>-1</sup>): 1790, 1665, 1643, 1580, 1267, 1250, 874, 743; MS (EI): *m/z* = 356.1 [(M+1)<sup>+</sup>].

**Methyl 2-(4-chlorobenzyl)-6-methyl-4-oxo-2,4-dihydrochromeno[3,4-c]pyrrole-3-carboxylate (4m)**

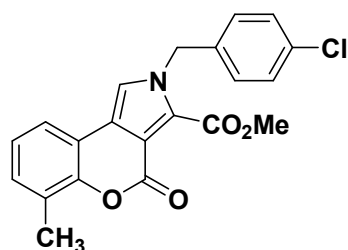

Yellow solid yield 72%, m.p. 200.5 °C <sup>1</sup>H NMR (400 MHz, CDCl<sub>3</sub>) δ (ppm): 7.43 (d, *J* = 7.6 Hz, 1 H), 7.30 (d, *J* = 8.4 Hz, 2H), 7.24 (s, 1H), 7.16 (d, *J* = 7.2 Hz, 1H), 7.09 (d, *J* = 8.4 Hz, 2H), 7.08 (d, *J*<sub>1</sub> = 3.2 Hz, *J*<sub>2</sub> = 8.4 Hz, 1H), 5.56 (s, 2H), 3.3

4 (s, 3H), 2.44 (s, 3H); <sup>13</sup>C NMR (CDCl<sub>3</sub>, 100 MHz) δ (ppm): 161.1, 156.3, 149.7, 134.5, 134.2, 129.8, 129.2, 128.6, 126.6, 124.3, 123.5, 123.3, 120.1, 118.8, 115.0, 111.5, 52.7, 52.6, 16.2; IR (KBr, cm<sup>-1</sup>): 1769, 1666, 1587, 1565, 1270, 1265, 872, 800; MS (EI): *m/z* = 382.40 [(M+1)<sup>+</sup>].

**Methyl 2-(4-nitrophenyl)-4-oxo-2,4-dihydrochromeno[3,4-c]pyrrole-3-carboxylate (4n).**

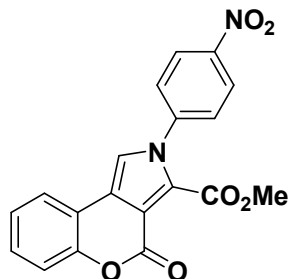

Yellow solid yield 70%, m.p. 99.0 °C <sup>1</sup>H NMR (400 MHz, CDCl<sub>3</sub>) δ (ppm): 8.40 (d, *J* = 1.6 Hz, 1H), 8.38 (d, *J* = 2.0 Hz, 1H), 7.66 (d, *J* = 7.6 Hz, 1H), 7.59 (d, *J* = 1.6 Hz, 1H), 7.57 (d, *J* = 1.6 Hz, 1H), 7.43 (d, *J* = 1.6 Hz, 1H), 7.39-7.33 (m, 3H), 7.24 (s,

1H), 3.88 (s, 3H); <sup>13</sup>C NMR (CDCl<sub>3</sub>, 100 MHz) δ (ppm): 160.2, 156.1, 151.5, 129.0, 126.5, 124.9, 124.4, 123.5, 122.7, 119.6, 118.5, 117.6, 114.9, 112.4, 53.0; IR (KBr, cm<sup>-1</sup>): 1777, 1662, 1555, 1549, 1280, 1266, 850, 790; MS (EI):

$m/z = 365.50[(M+1)^+]$ .

**Methyl 2-(4-chlorobenzyl)-4-oxo-2,4-dihydrochromeno[3,4-c]pyrrole-3-carboxylate (4o)**

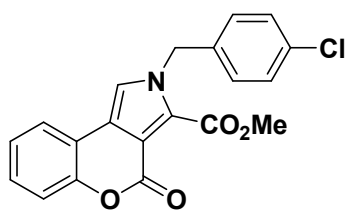

Yellow solid yield 89%, m.p. 198.9 °C <sup>1</sup>H NMR (400 MHz, CDCl<sub>3</sub>) δ (ppm): 7.57 (d, *J* = 7.2 Hz, 1 H), 7.30 (d, *J* = 7.6 Hz, 4H), 7.29 (s, 1H), 7.18 (t d, *J*<sub>1</sub> = 2.0 Hz, *J*<sub>2</sub> = 7.6 Hz, 4H), 7.09 (d, *J* = 8.4

Hz, 2H), 3.94 (s, 3H); <sup>13</sup>C NMR (CDCl<sub>3</sub>, 100 MHz) δ (ppm): 161.0, 156.2, 151.3, 134.5, 129.2, 128.6, 128.4, 124.0, 122.9, 122.5, 118.6, 117.3, 115.4, 111.4, 52.8. 527; IR (KBr, cm<sup>-1</sup>): 1791, 1670, 1659, 1559, 1278, 1266, 869, 756; MS (EI):  $m/z = 368.50 [(M+1)^+]$ .

**Methyl 2-(4-chlorobenzyl)-8-bromo-4-oxo-2,4-dihydrochromeno[3,4-c]pyrrole-3-carboxylate (4p)**

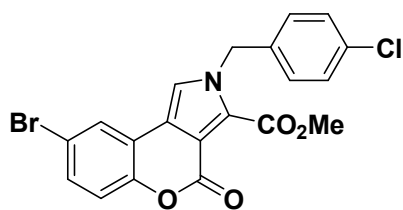

Yellow solid yield 84%, m.p. 259.5 °C <sup>1</sup>H NMR (400 MHz, CDCl<sub>3</sub>) δ (ppm): 7.69 (d, *J* = 2.0 Hz, 1H), 7.39 (dd, *J*<sub>1</sub> = 2.0 Hz, *J*<sub>2</sub> = 8.8 Hz, 1 H), 7.30 (d, *J* = 8.0 Hz, 2H), 7.25 (s, 1H), 7.14

(d, 8.8 Hz, 1H), 7.10 (d, *J* = 8.4 Hz, 2H), 5.54 (s, 2H), 3.94 (s, 3H); <sup>13</sup>C NMR (CDCl<sub>3</sub>, 100 MHz) δ (ppm): 160.8, 155.6, 150.2, 147.6, 137.1, 134.5, 134.2, 131.5, 131.1, 129.3, 128.7, 125.2, 121.6, 119.0, 118.9, 117.3, 116.6, 111.0, 52.8, 52.7; IR (KBr, cm<sup>-1</sup>): 1788, 1687, 1664, 1580, 1299, 1278, 832, 748; MS (EI):  $m/z = 448.30 [(M+1)^+]$ .

**Methyl 2-(4-chlorobenzyl)-8-fluoro-4-oxo-2,4-dihydrochromeno[3,4-c]pyrrole-3-carboxylate (4q)**

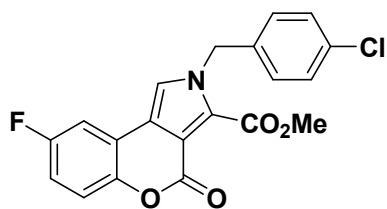

Yellow solid yield 86%, m.p. 260.5 °C <sup>1</sup>H NMR (400 MHz, CDCl<sub>3</sub>) δ (ppm): 7.27 (d, *J* = 2.0 Hz, 1H), 7.31 (d, *J* = 1.6 Hz, 1H), 7.25 (d, *J* = 2.8 Hz, 1H), 7.24 (d, *J* = 2.0 Hz, 2H), 7.12 (d, *J* =

6.8 Hz, 2H), 7.05-6.99 (m, 1H), 5.55 (s, 2H), 3.94 (s, 3H); <sup>13</sup>C NMR (CDCl<sub>3</sub>, 100 MHz) δ (ppm): 160.85, 160.02, 157.6, 155.8, 147.5 (d, *J* = 8.0 Hz), 134.2, 134.3, 129.2 (d, *J* = 230 Hz), 128.7 (d, *J* = 23 Hz), 118.9 (d, *J* = 34.8 Hz), 118.7 (d, *J* = 34.8 Hz), 118.6, 115.6, 115.4, 108.6, 108.4, 52.8, 52.7; IR (



KBr,  $\text{cm}^{-1}$ ): 1790, 1699, 1682, 1599, 1275, 1263, 867, 760; MS (EI):  $m/z = 3$   
86.40  $[(M+1)^+]$ .



**Methyl 2-benzyl-8-bromo-4-oxo-2,4-dihydrochromeno[3,4-c]pyrrole-3-carboxylate (4b)**

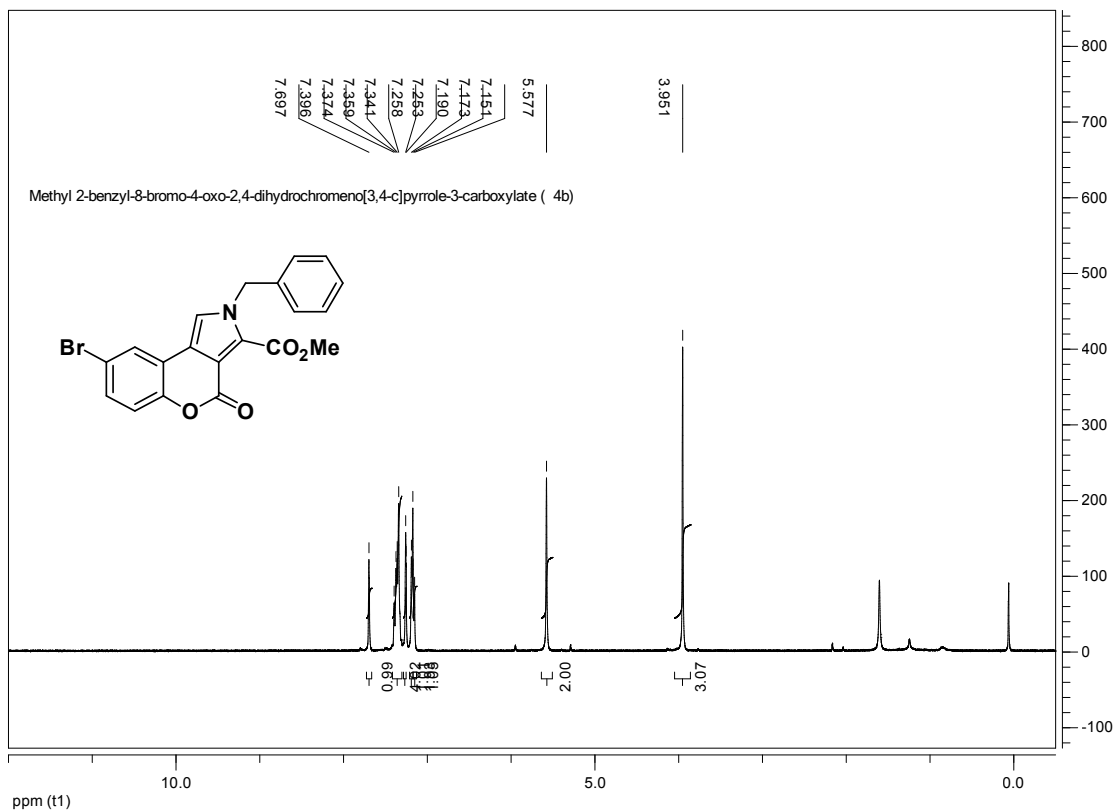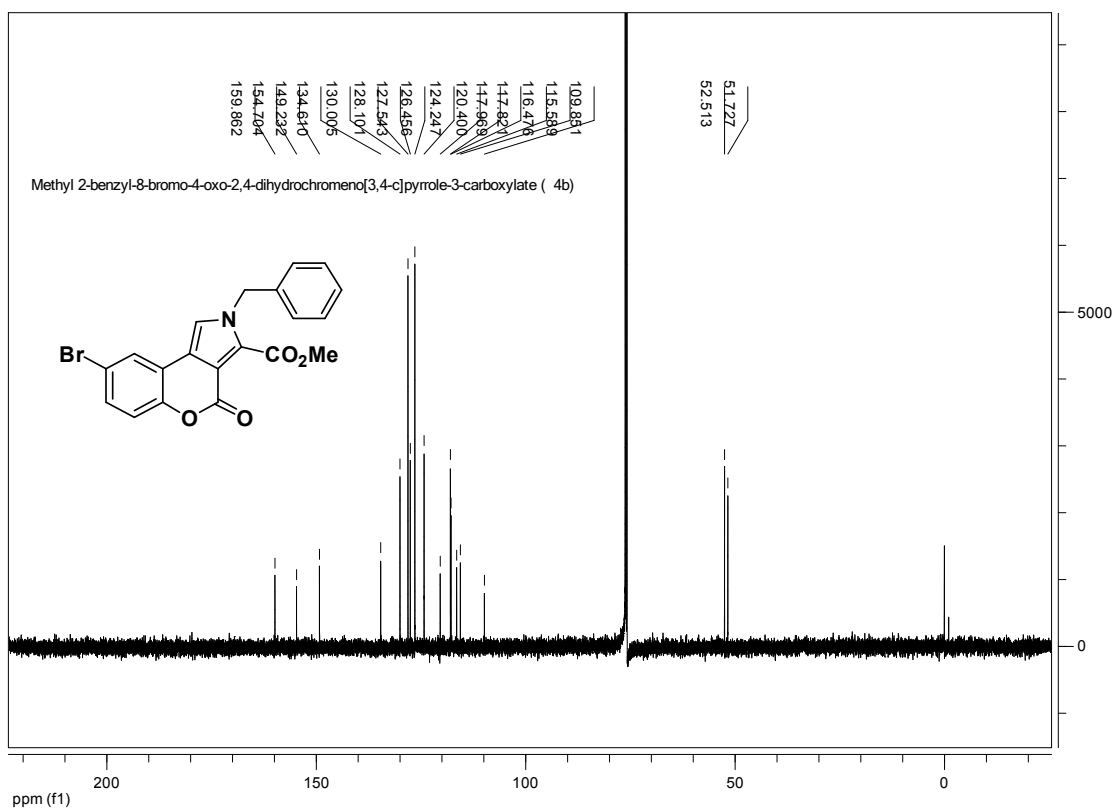

**Methyl 2-benzyl-6-methyl-4-oxo-2,4-dihydrochromeno[3,4-c]pyrrole-3-carboxylate (4c)**

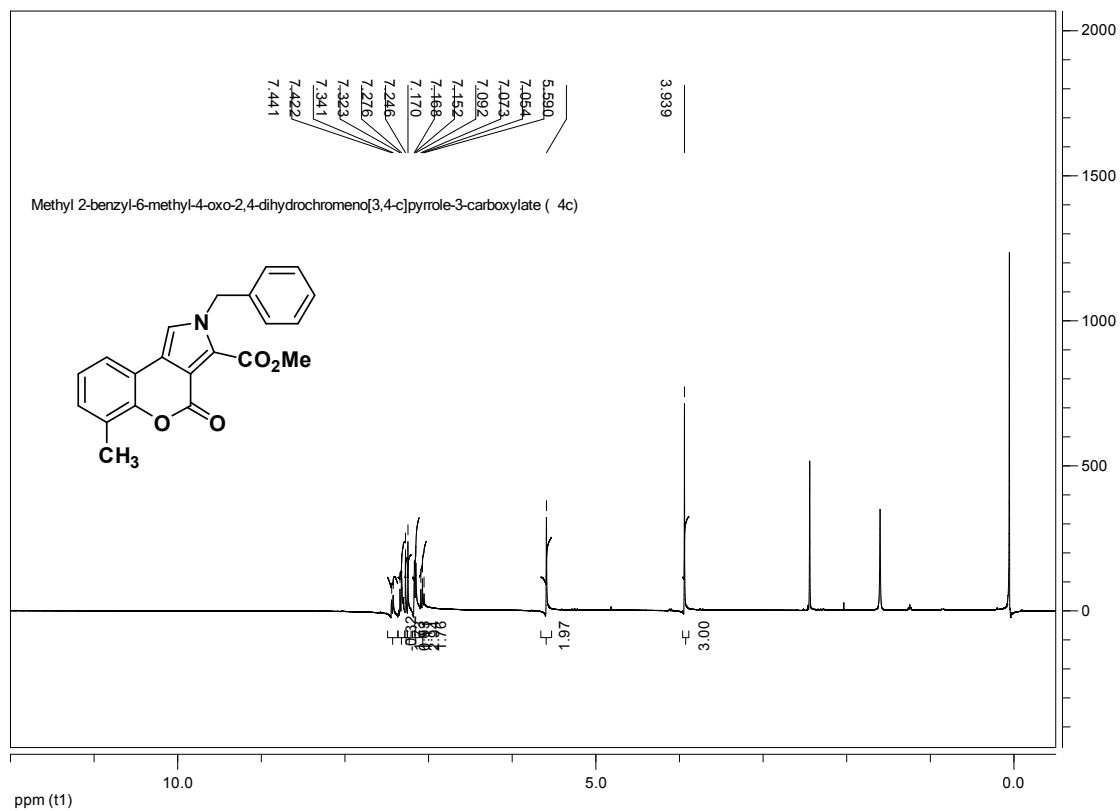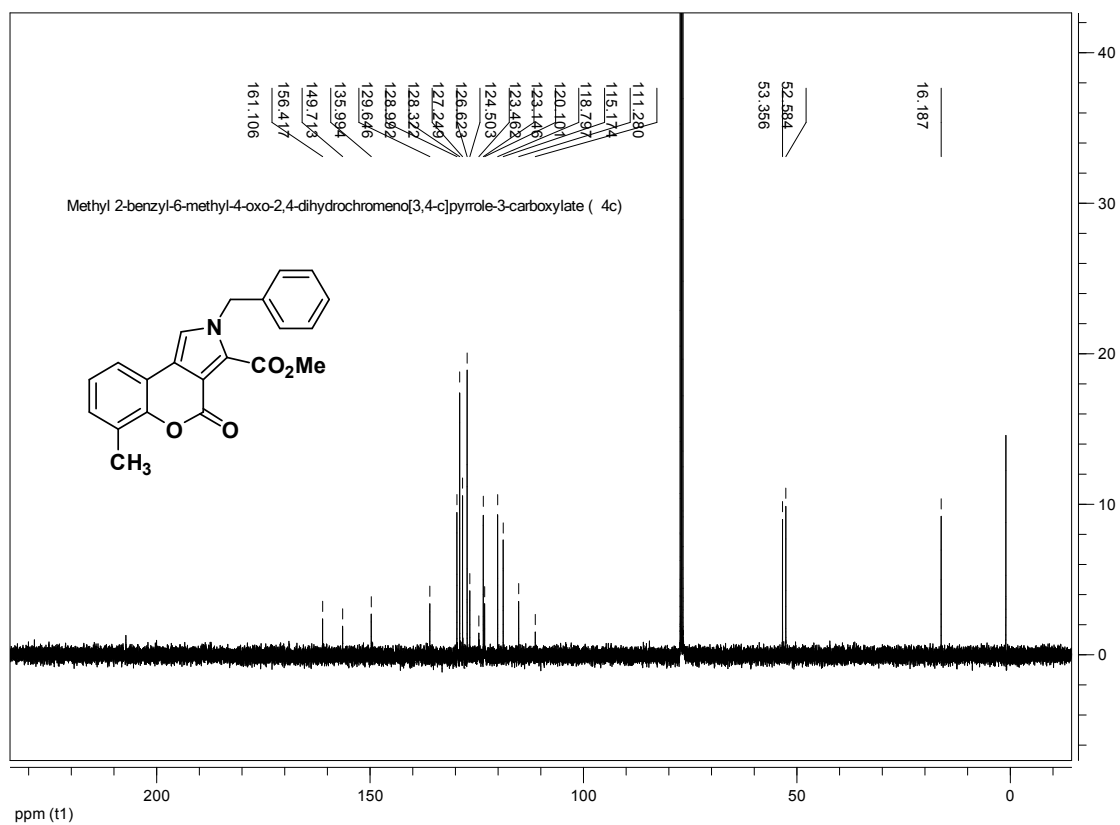

**Methyl 2-benzyl-8-chloro-4-oxo-2,4-dihydrochromeno[3,4-c]pyrrole-3-carboxylate (4d)**

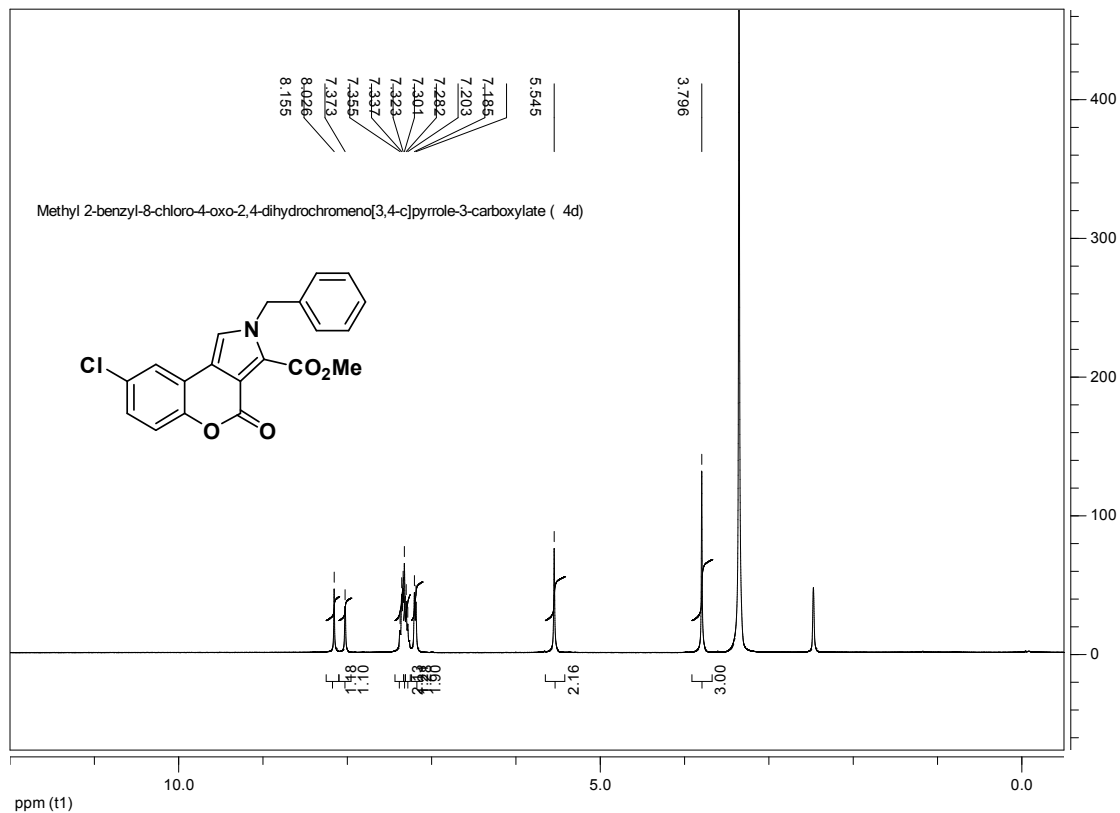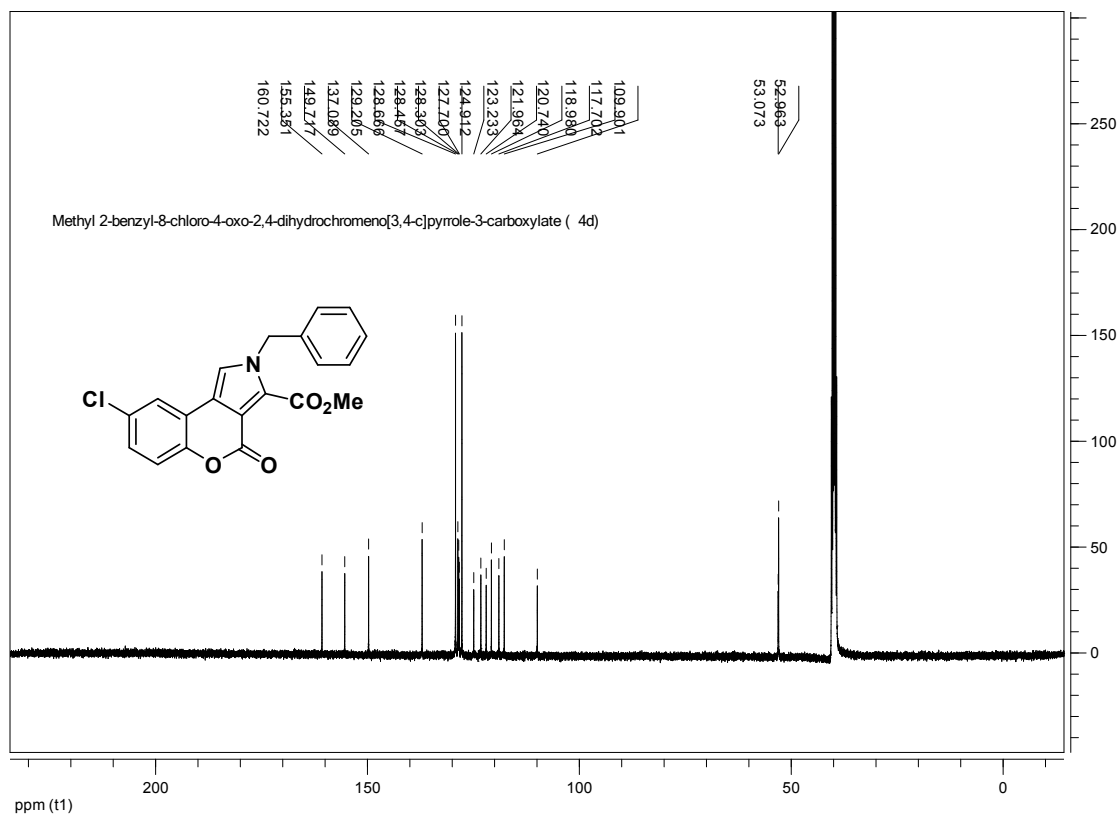

**Methyl 2-benzyl-8-fluoro-4-oxo-2,4-dihydrochromeno[3,4-c]pyrrole-3-carboxylate (4e)**

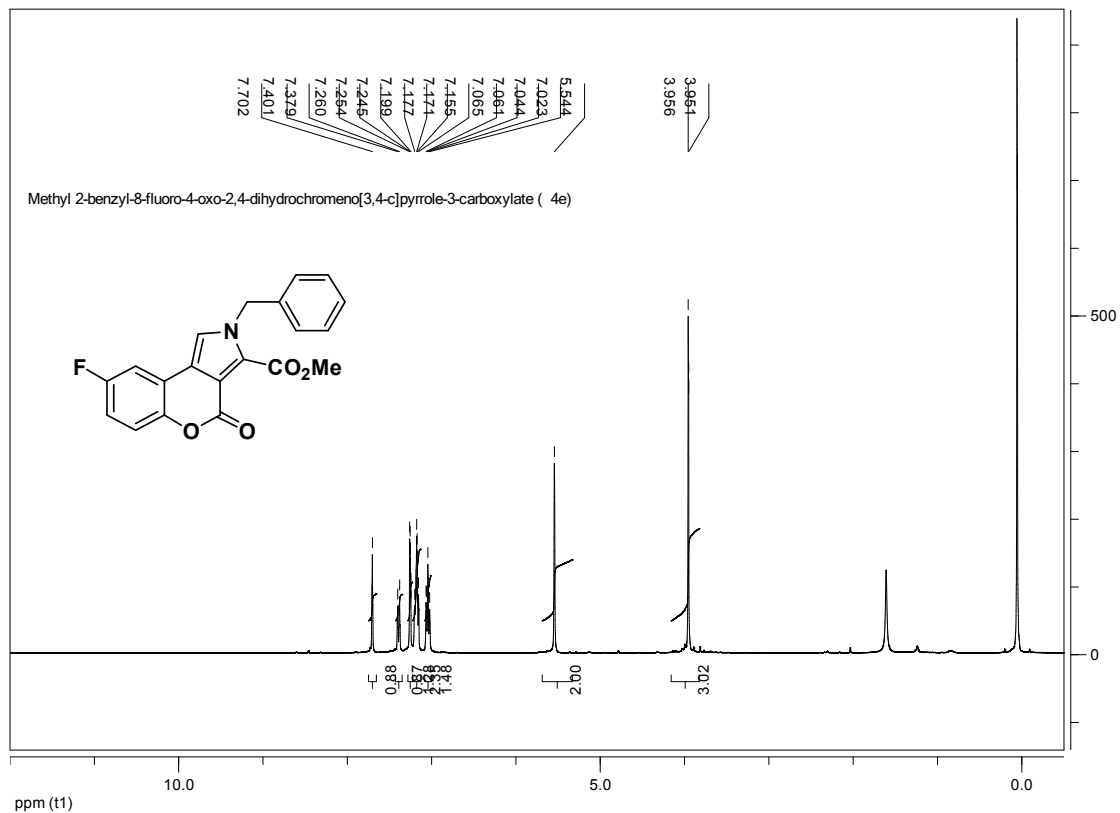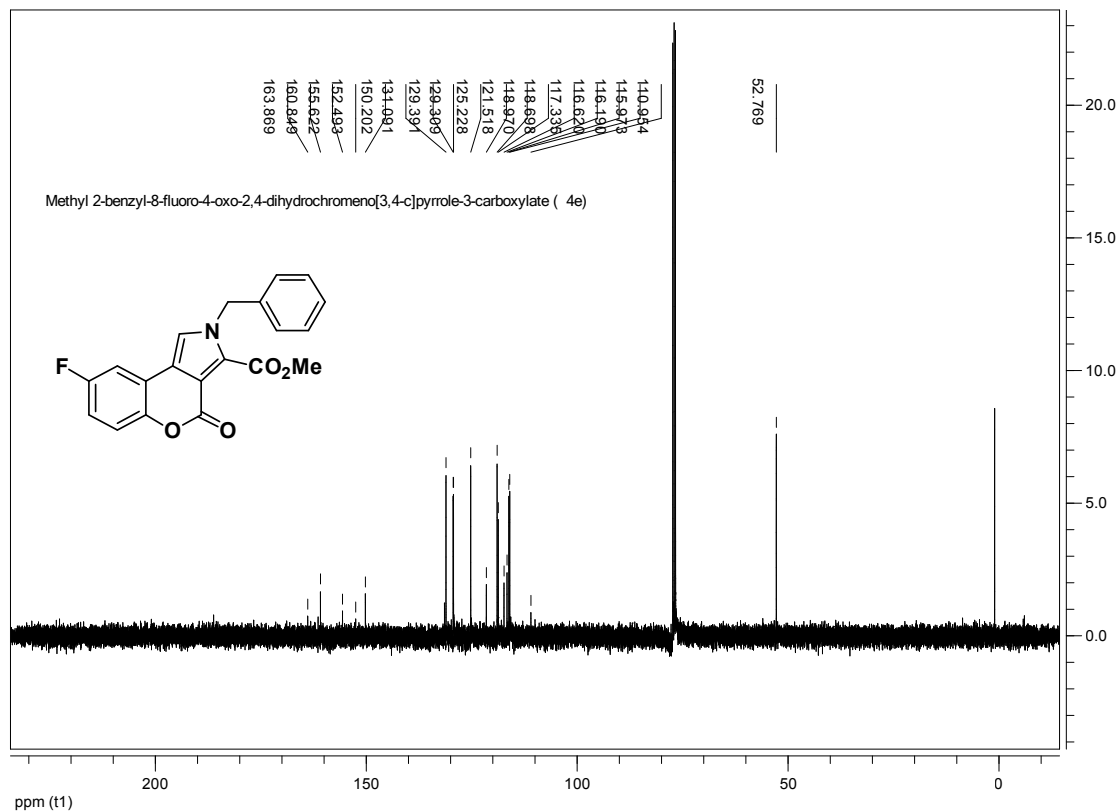



**carboxylate (4g)**

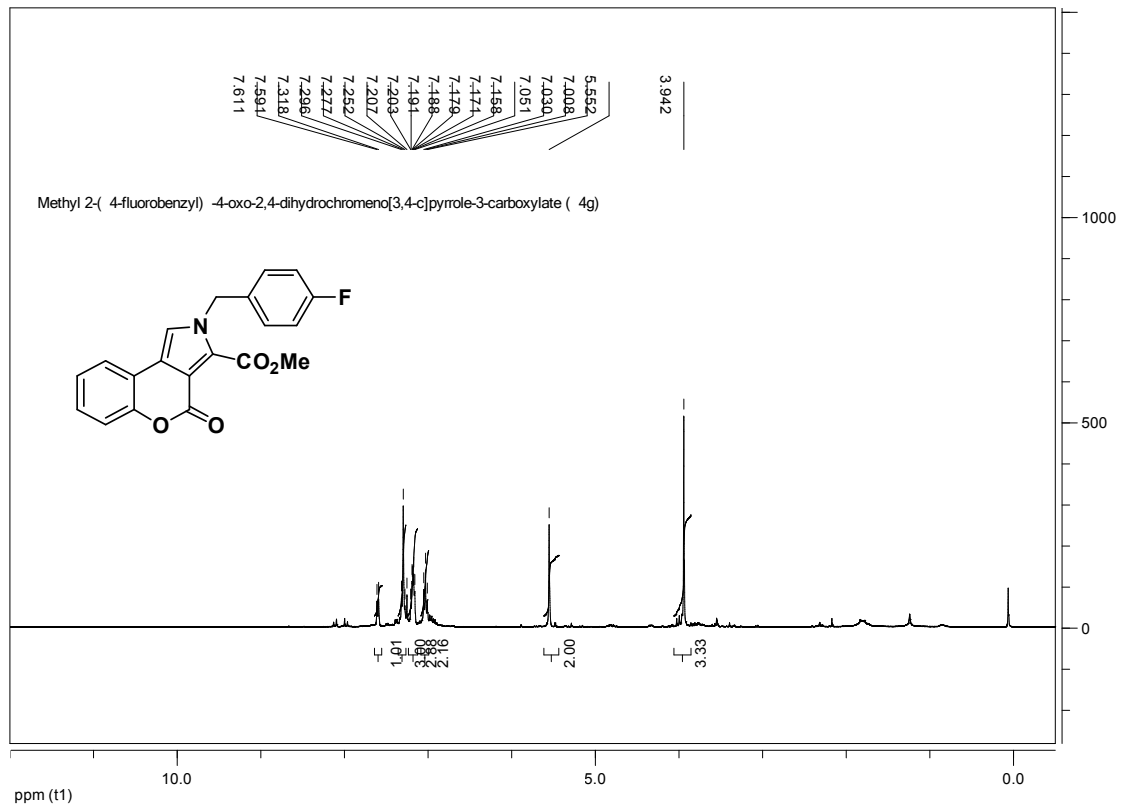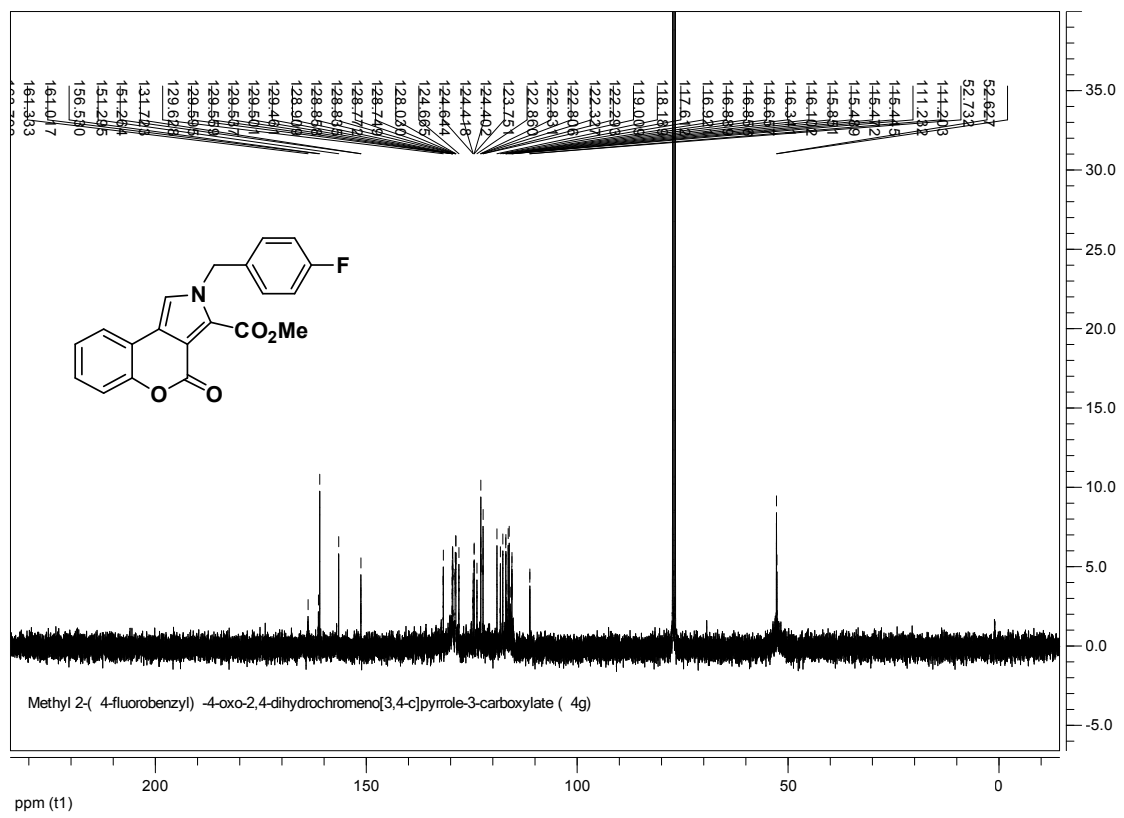

**Methyl 2-(4-methoxyphenyl)-4-oxo-2,4-dihydrochromeno[3,4-c]pyrrole-3-**



**carboxylate (4h)**

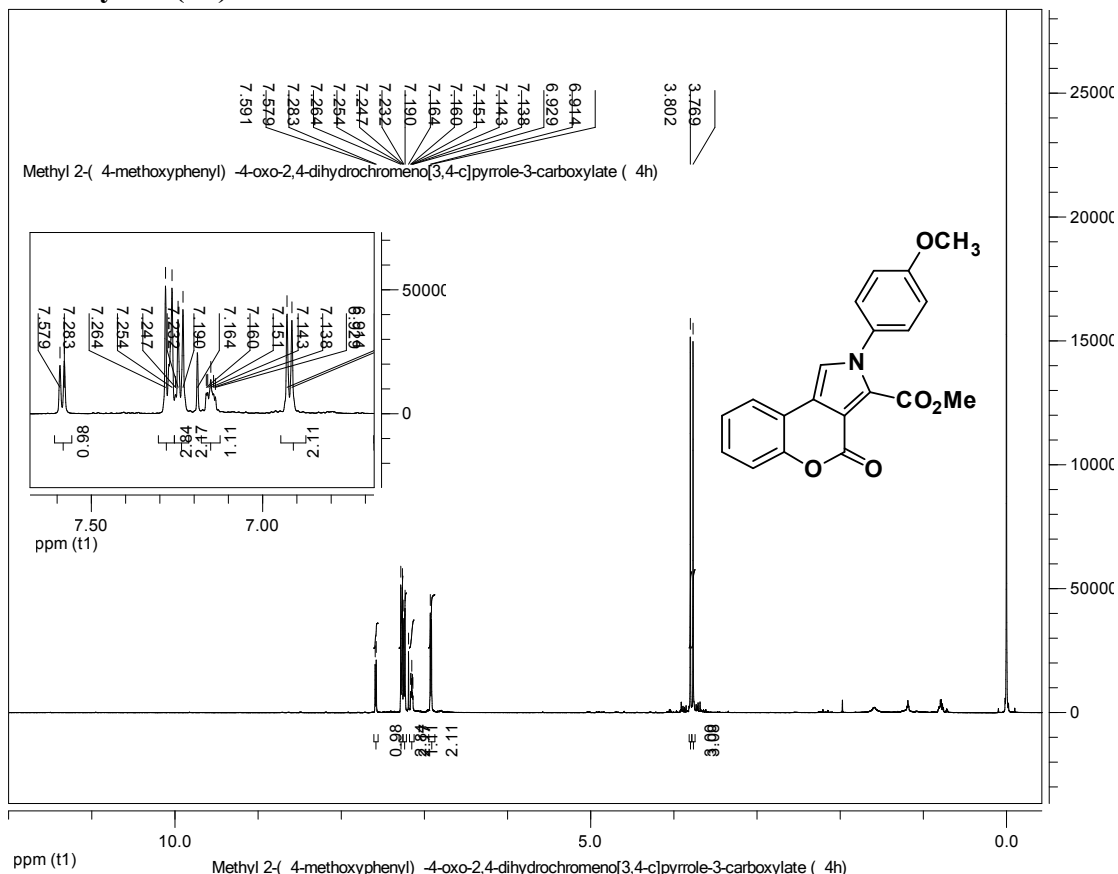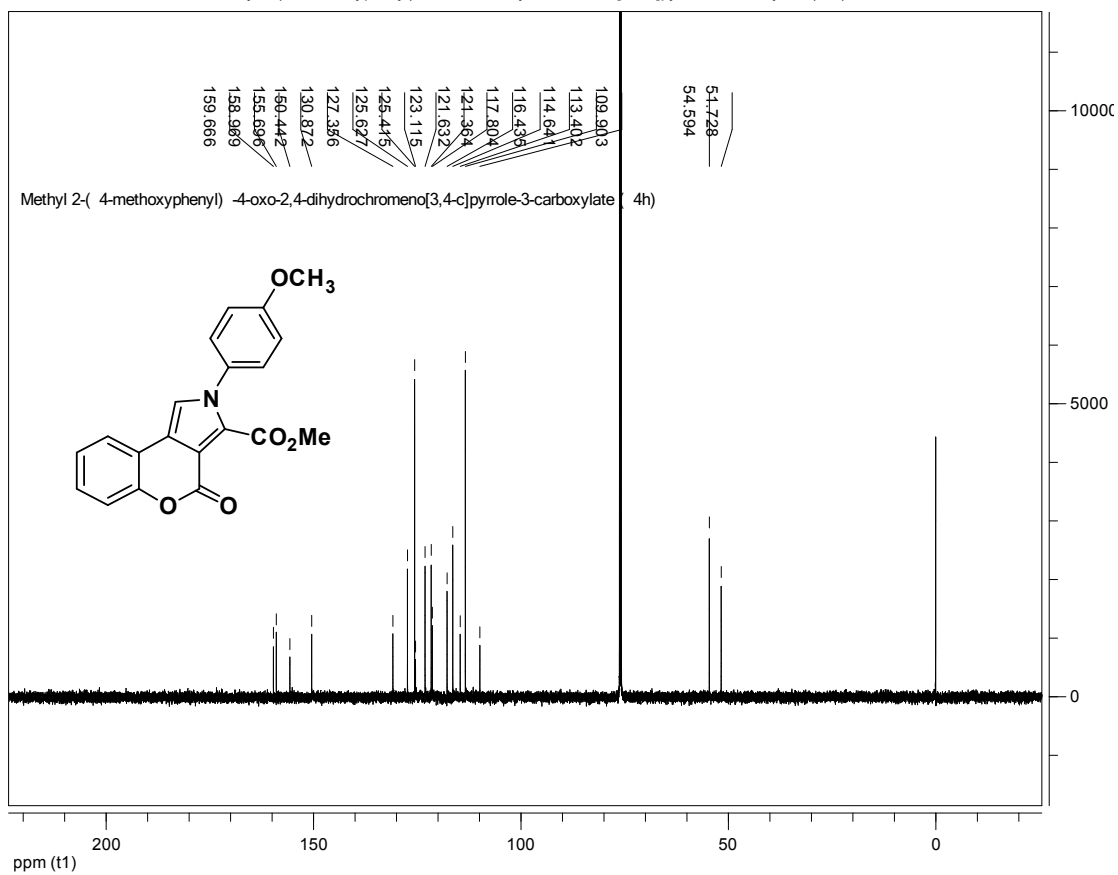

**Methyl 8-chloro-2-(4-methoxyphenyl)-4-oxo-2,4-dihydrochromeno[3,4-c]pyrrole-3-carboxylate (4i)**

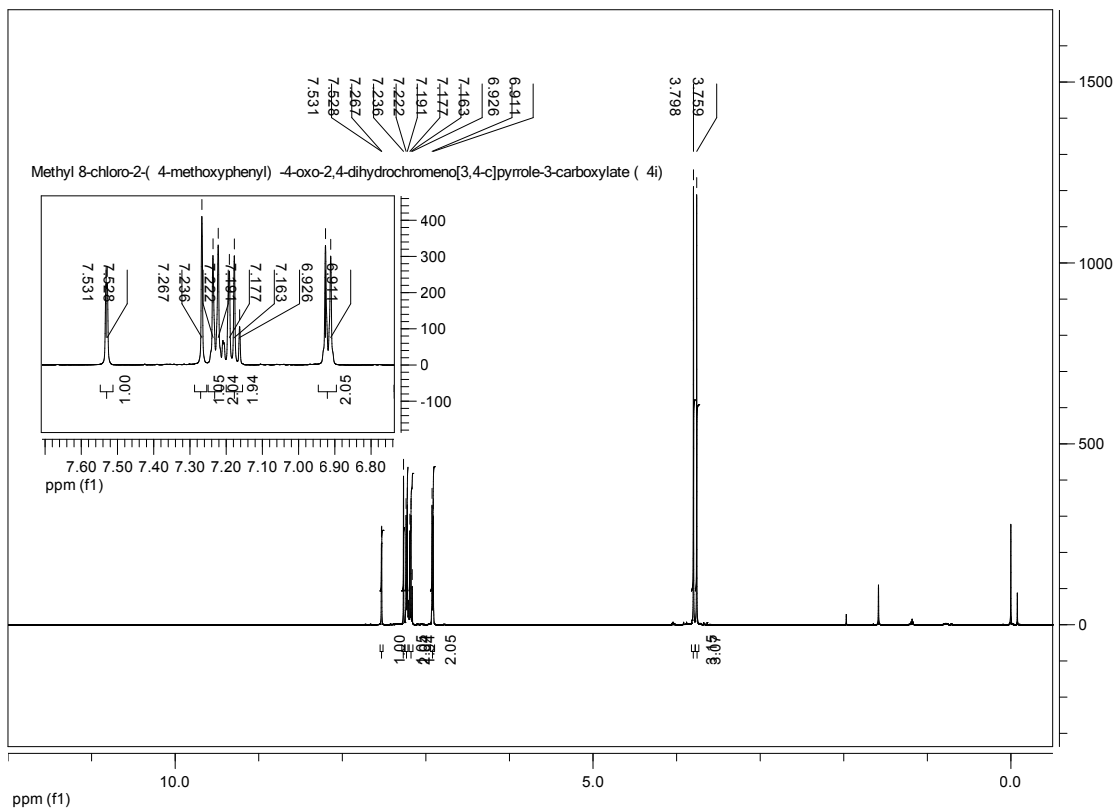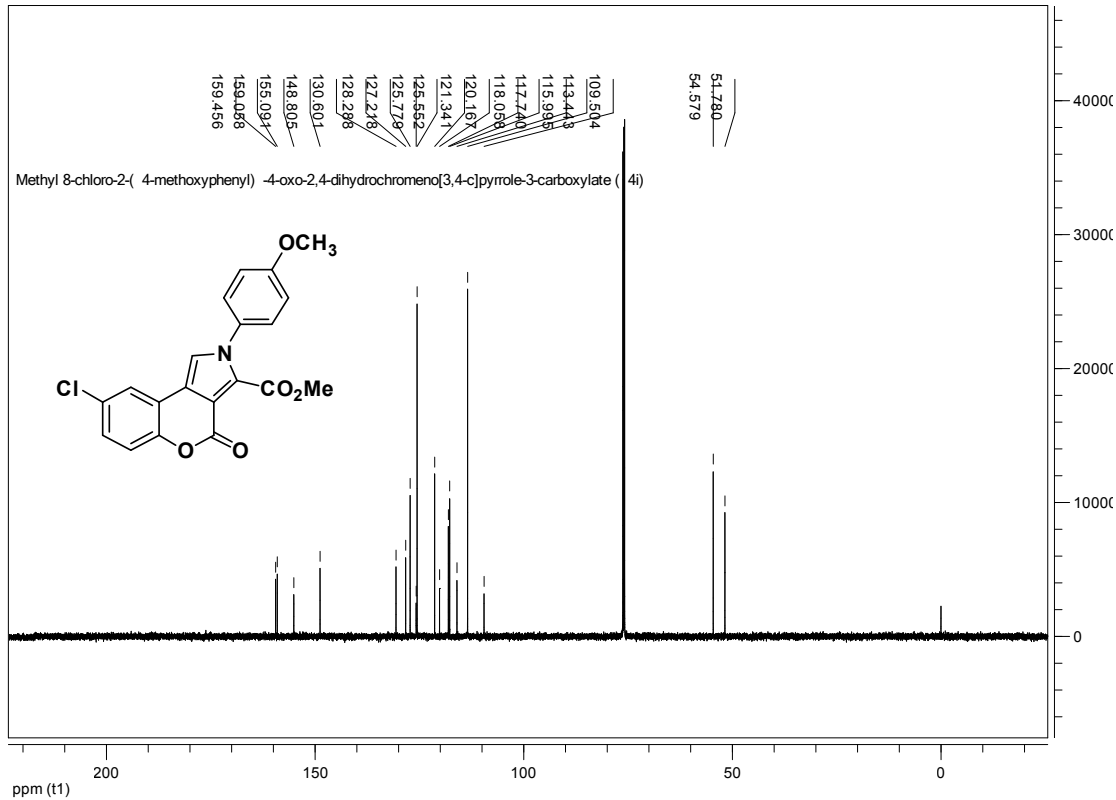

**Methyl 8-bromo-4-oxo-2-m-tolyl-2,4-dihydrochromeno[3,4-c]pyrrole-3-carboxylate (4j)**

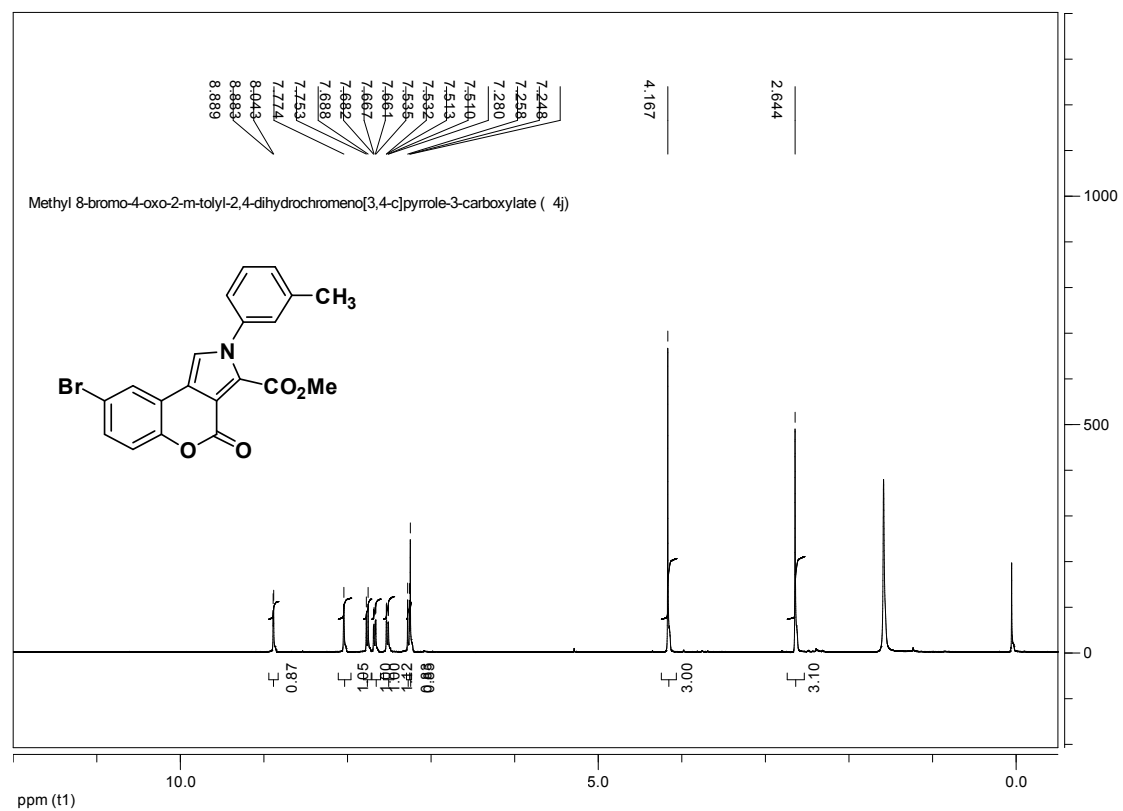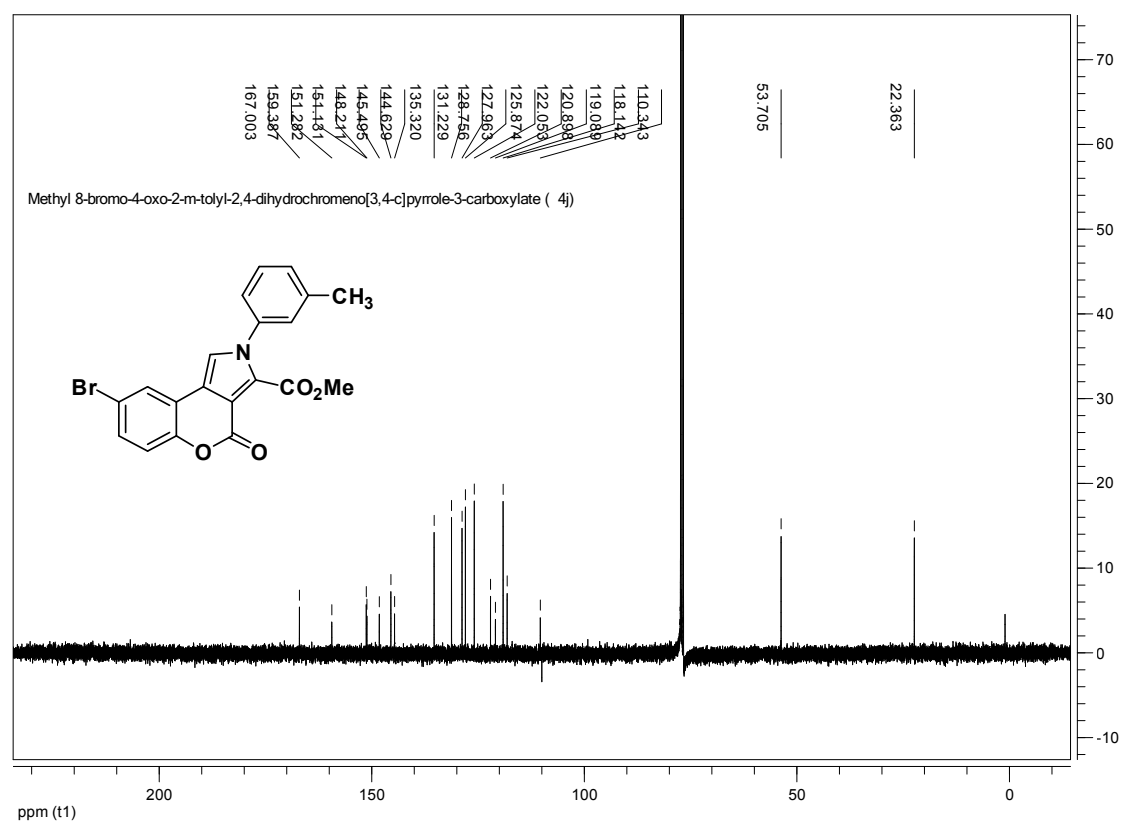

# Methyl 8-bromo-2-octyl-4-oxo-2,4-dihydrochromeno[3,4-c]pyrrole-3-carboxylate

(4k)

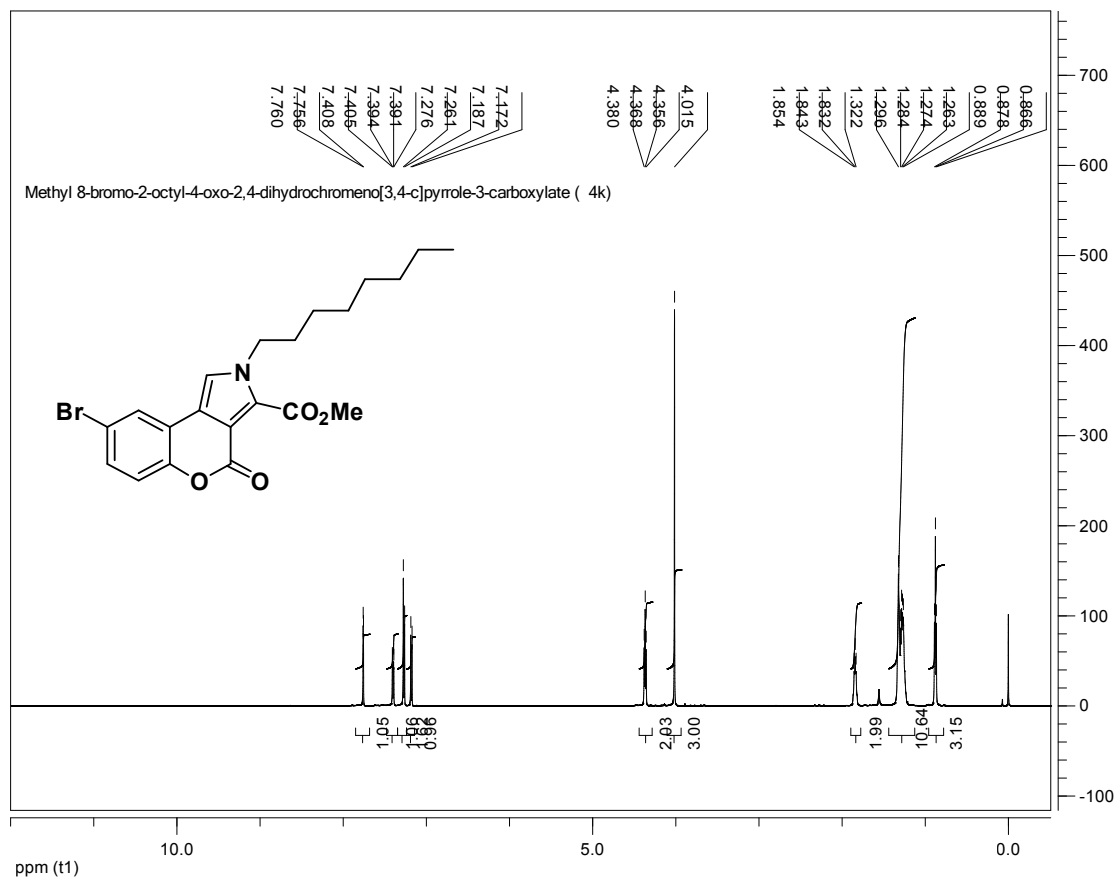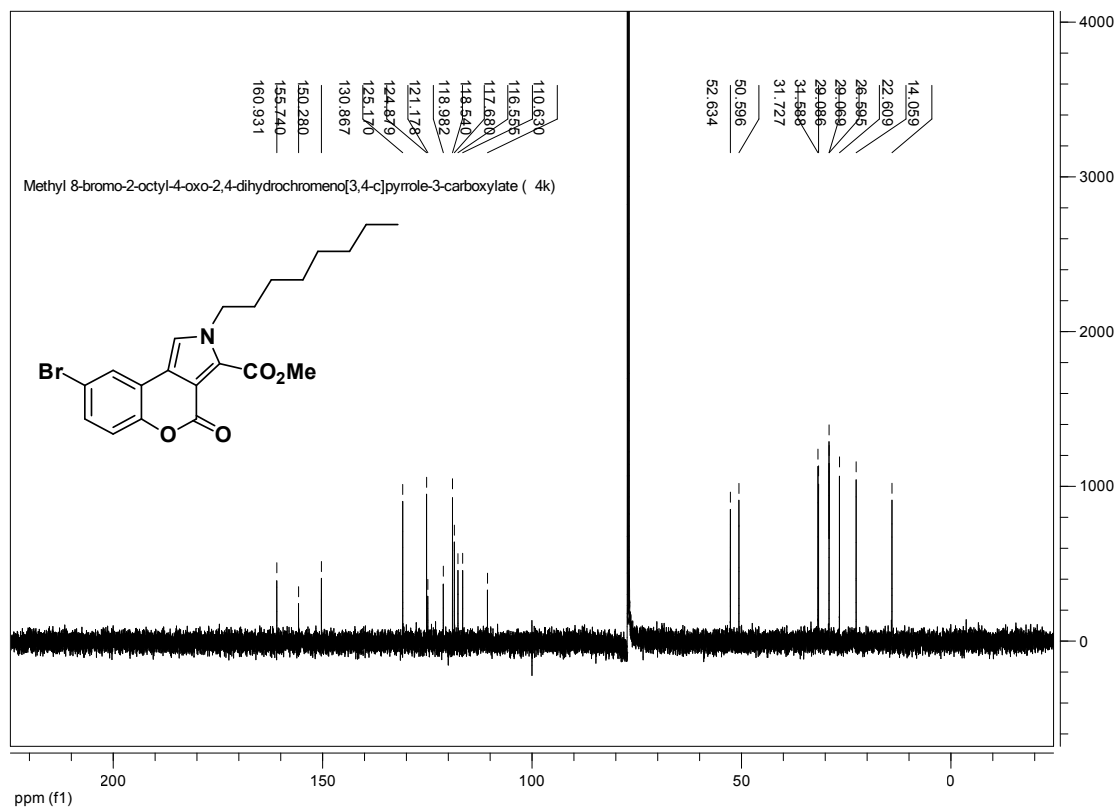

# Methyl 2-octyl-4-oxo-2,4-dihydrochromeno[3,4-c]pyrrole-3-carboxylate (4l)

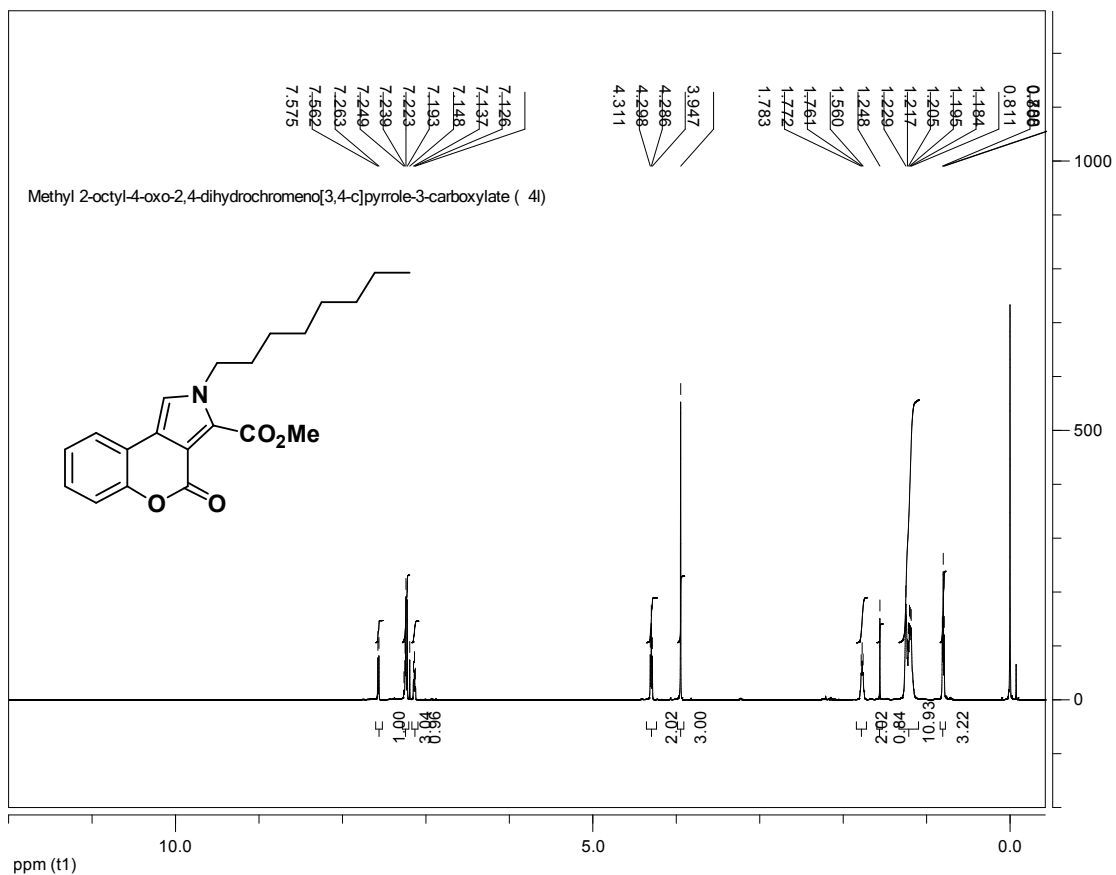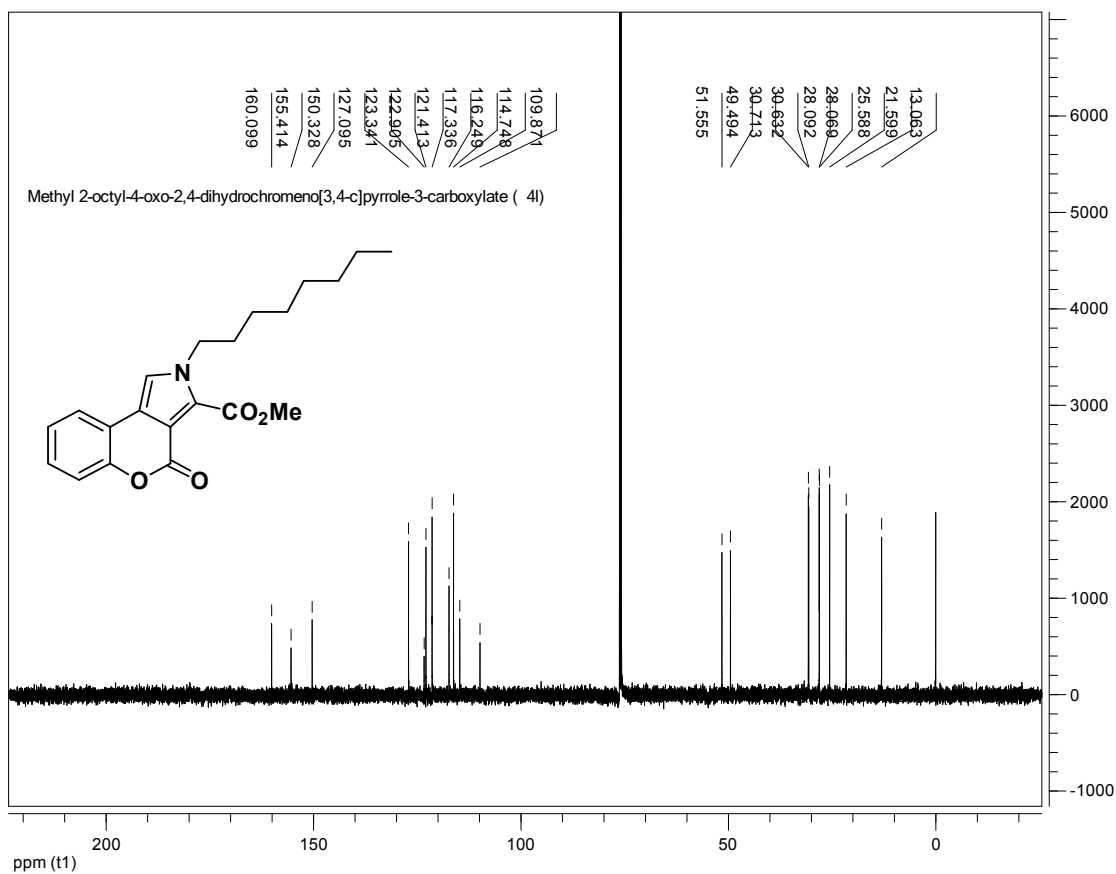

**Methyl 2-(4-chlorobenzyl)-6-methyl-4-oxo-2,4-dihydrochromeno[3,4-c]pyrrole-3-carboxylate (4m)**

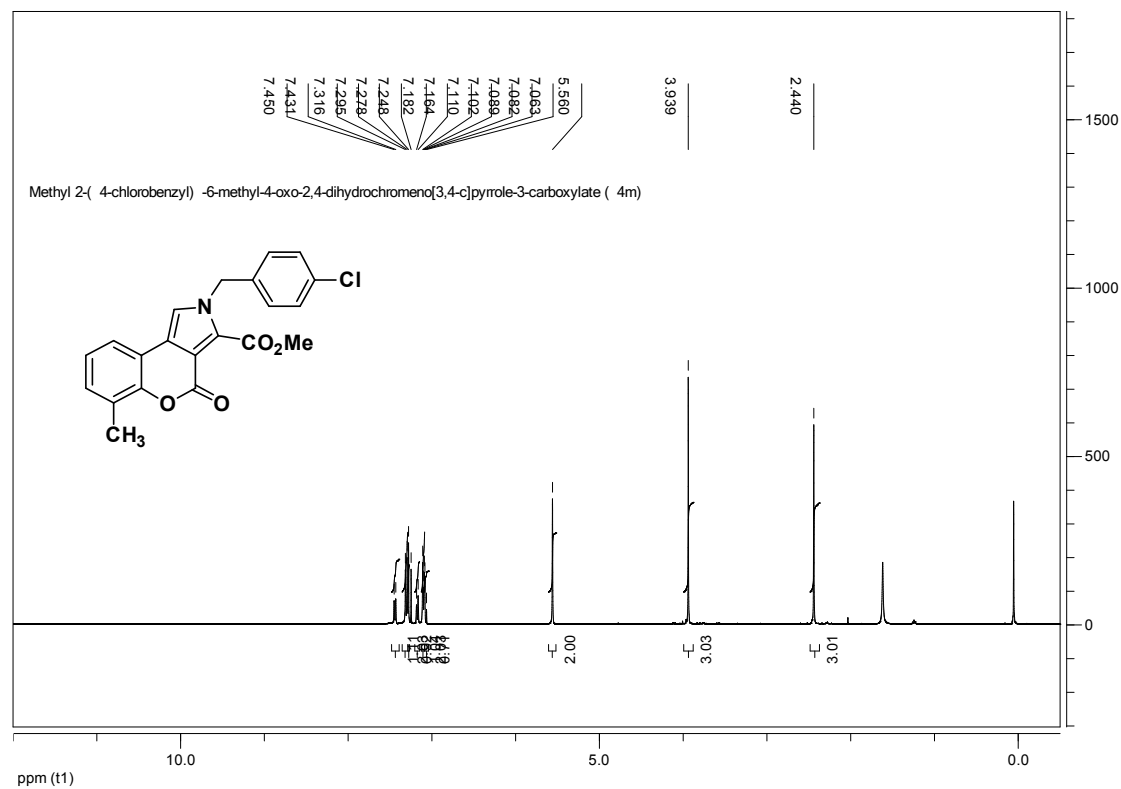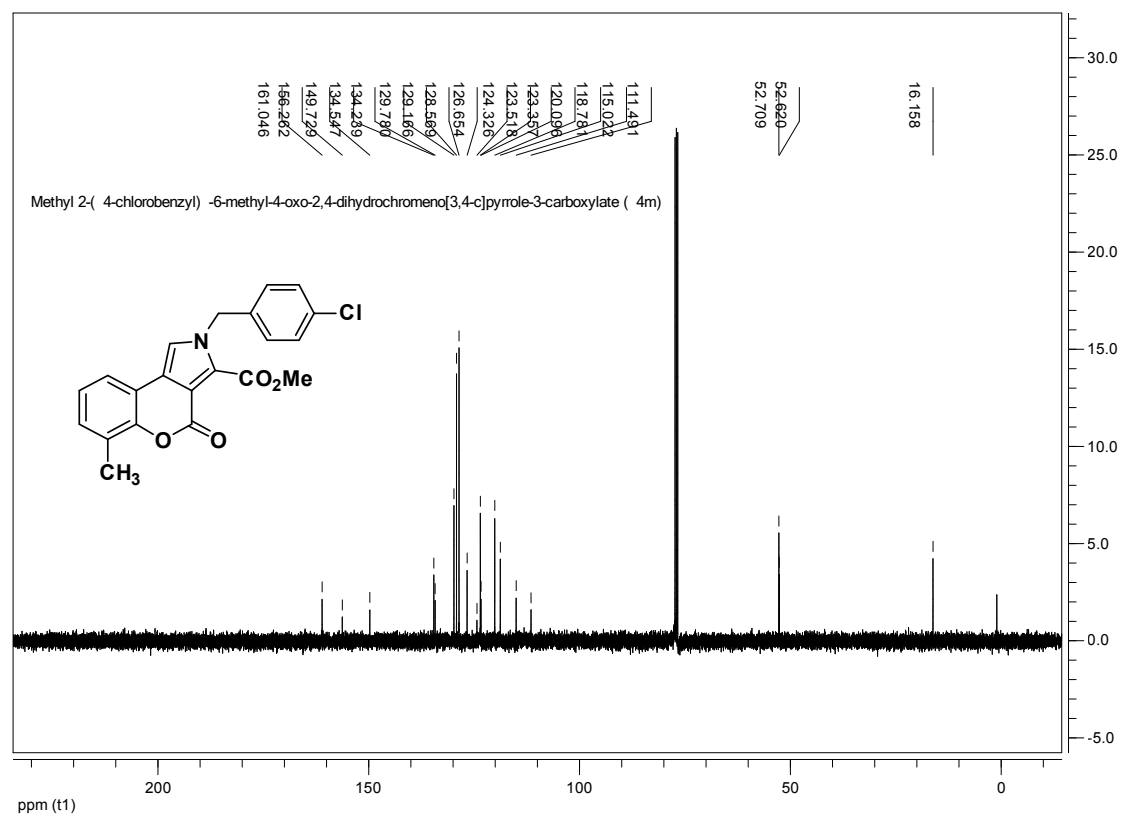



**Methyl 2-(4-chlorobenzyl)-4-oxo-2,4-dihydrochromeno[3,4-c]pyrrole-3-carboxylate (4o)**

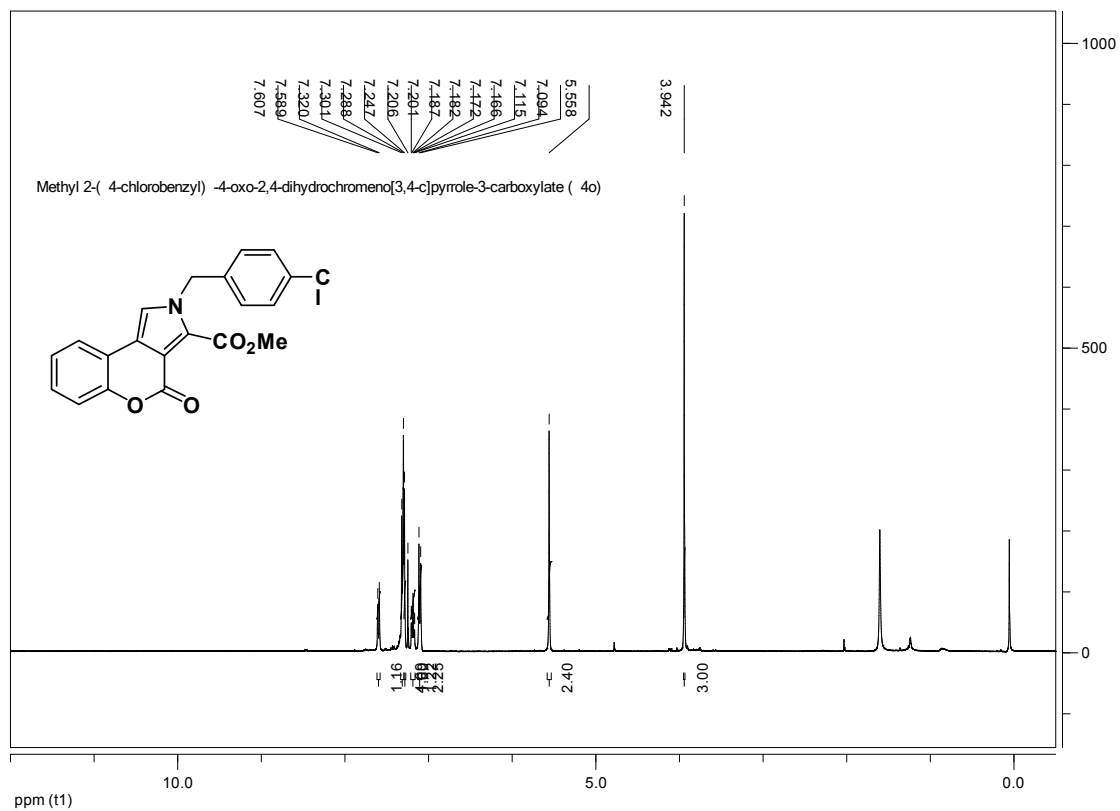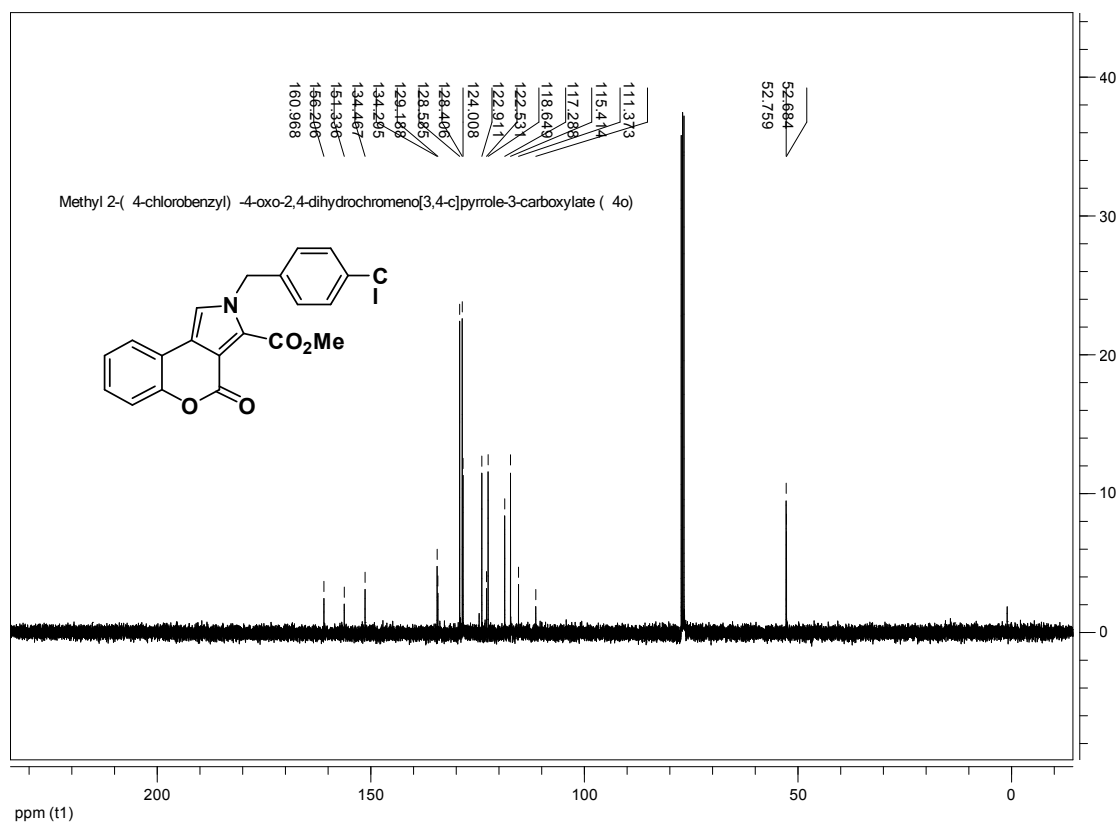



**Methyl 2-(4-chlorobenzyl)-8-bromo-4-oxo-2,4-dihydrochromeno[3,4-c]pyrrole-3-carboxylate (4p)**

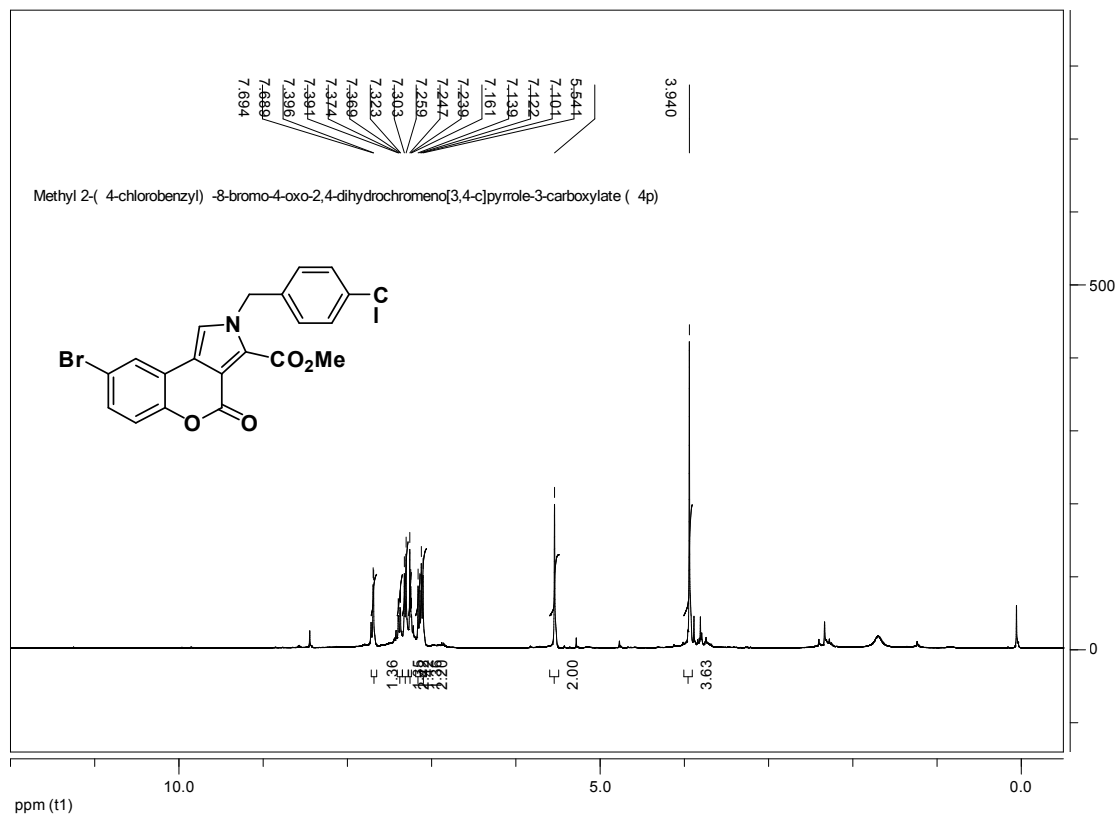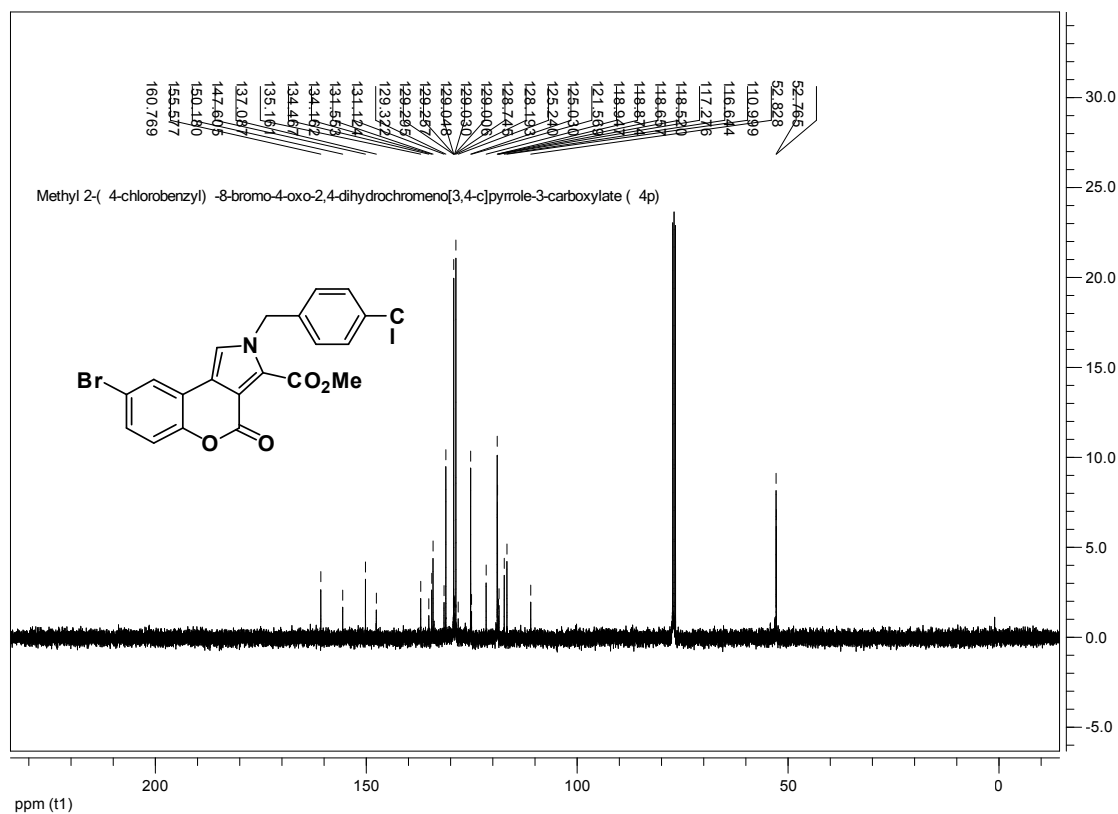

**Methyl 2-(4-chlorobenzyl)-8-fluoro-4-oxo-2,4-dihydrochromeno[3,4-c]pyrrole-3-**

# carboxylate (4q)

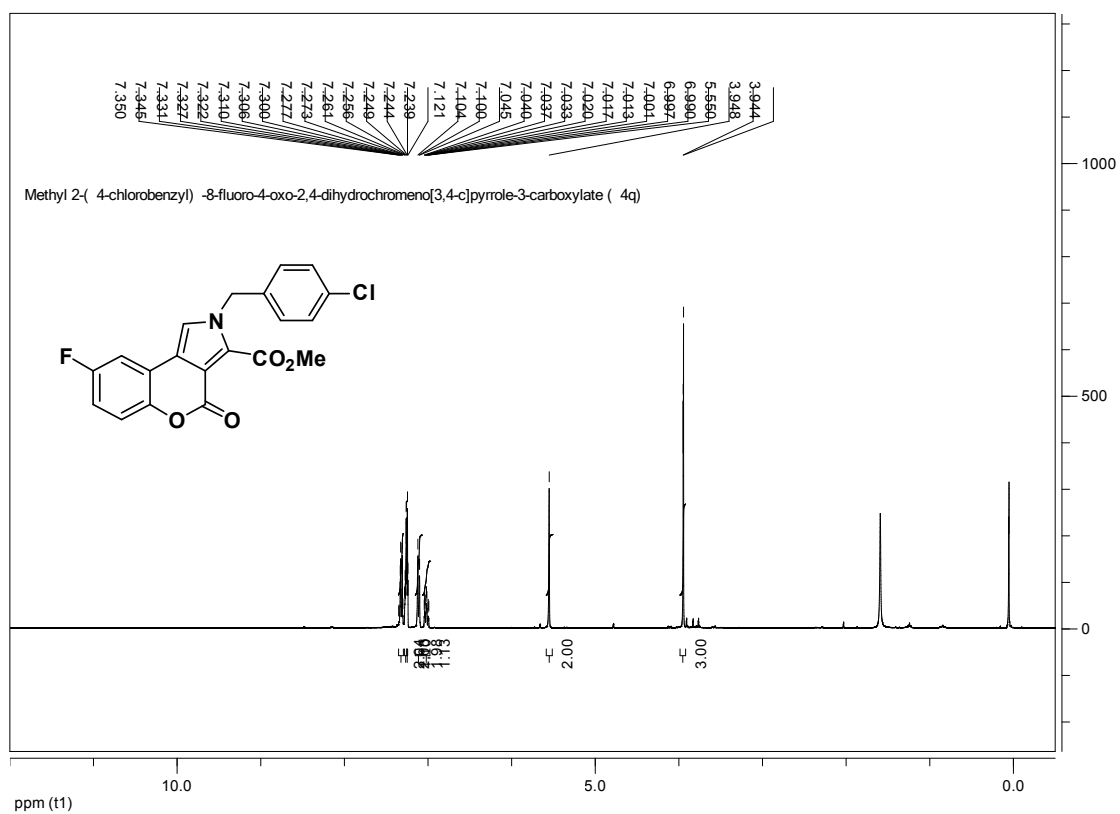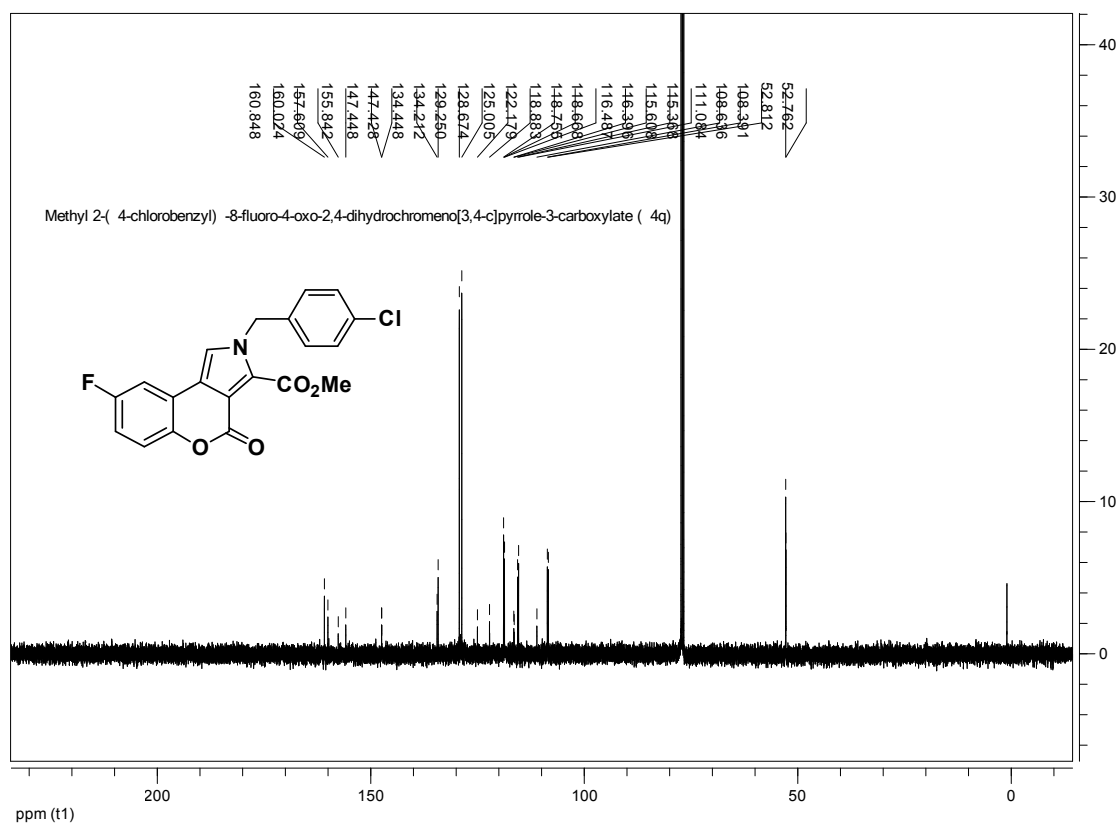

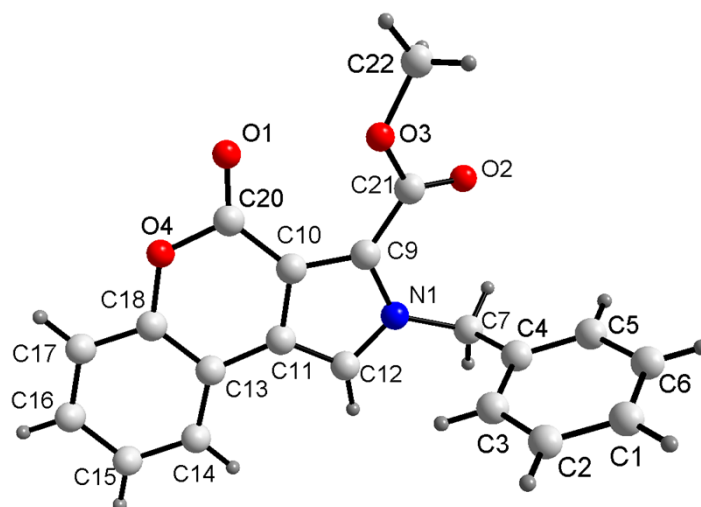

Table 1. Crystal data and structure refinement for **4a**.

|                                 |                                                                                                                 |
|---------------------------------|-----------------------------------------------------------------------------------------------------------------|
| Identification code             | <b>4a</b>                                                                                                       |
| Empirical formula               | C <sub>20</sub> H <sub>15</sub> N O <sub>4</sub>                                                                |
| Formula weight                  | 333.33                                                                                                          |
| Temperature                     | 296(2) K                                                                                                        |
| Wavelength                      | 0.71073 Å                                                                                                       |
| Crystal system, space group     | Orthorhombic, P b c a                                                                                           |
| Unit cell dimensions            | a = 16.874(3) Å    alpha = 90 deg.<br>b = 10.8932(19) Å    beta = 90 deg.<br>c = 17.308(3) Å    gamma = 90 deg. |
| Volume                          | 3181.4(10) Å <sup>3</sup>                                                                                       |
| Z, Calculated density           | 8, 1.392 Mg/m <sup>3</sup>                                                                                      |
| Absorption coefficient          | 0.098 mm <sup>-1</sup>                                                                                          |
| F(000)                          | 1392                                                                                                            |
| Crystal size                    | 0.35 x 0.33 x 0.3 mm                                                                                            |
| Theta range for data collection | 2.41 to 27.59 deg.                                                                                              |
| Limiting indices                | -21 ≤ h ≤ 21, -14 ≤ k ≤ 11, -19 ≤ l ≤ 22                                                                        |
| Reflections collected / unique  | 26265 / 3687 [R(int) = 0.1208]                                                                                  |
| Completeness to theta = 27.59   | 99.6 %                                                                                                          |

|                                   |                                             |
|-----------------------------------|---------------------------------------------|
| Refinement method                 | Full-matrix least-squares on F <sup>2</sup> |
| Data / restraints / parameters    | 3672 / 0 / 227                              |
| Goodness-of-fit on F <sup>2</sup> | 0.996                                       |
| Final R indices [I>2sigma(I)]     | R1 = 0.0720, wR2 = 0.1431                   |
| R indices (all data)              | R1 = 0.1961, wR2 = 0.1826                   |
| Largest diff. peak and hole       | 0.465 and -0.277 e.A <sup>-3</sup>          |

Table 2. Atomic coordinates ( $\times 10^4$ ) and equivalent isotropic displacement parameters ( $\text{Å}^2 \times 10^3$ ) for **4a**.

$U(\text{eq})$  is defined as one third of the trace of the orthogonalized  $U_{ij}$  tensor.

|       | x       | y        | z        | $U(\text{eq})$ |
|-------|---------|----------|----------|----------------|
| O(4)  | 1018(1) | 9016(2)  | 10100(1) | 49(1)          |
| C(11) | 2632(2) | 9253(2)  | 10248(2) | 38(1)          |
| N(1)  | 3622(1) | 8189(2)  | 9749(1)  | 44(1)          |
| C(18) | 1319(2) | 9896(2)  | 10594(2) | 40(1)          |
| O(1)  | 1102(1) | 7543(3)  | 9257(2)  | 83(1)          |
| O(3)  | 2363(2) | 6669(2)  | 8416(2)  | 80(1)          |
| C(10) | 2317(2) | 8396(2)  | 9724(2)  | 36(1)          |
| C(20) | 1470(2) | 8248(3)  | 9644(2)  | 48(1)          |
| C(9)  | 2950(2) | 7740(2)  | 9410(2)  | 39(1)          |
| C(13) | 2127(2) | 10062(2) | 10685(2) | 38(1)          |
| C(7)  | 4454(2) | 7852(3)  | 9591(2)  | 51(1)          |
| O(2)  | 3514(2) | 6001(2)  | 8815(2)  | 93(1)          |
| C(12) | 3437(2) | 9103(3)  | 10249(2) | 45(1)          |
| C(5)  | 5315(2) | 7918(3)  | 8423(2)  | 55(1)          |
| C(4)  | 4792(2) | 8517(3)  | 8907(2)  | 42(1)          |
| C(17) | 780(2)  | 10589(3) | 10998(2) | 55(1)          |
| C(14) | 2378(2) | 10980(3) | 11189(2) | 52(1)          |
| C(21) | 2987(2) | 6733(3)  | 8856(2)  | 48(1)          |
| C(3)  | 4630(2) | 9738(3)  | 8767(2)  | 55(1)          |
| C(2)  | 4980(2) | 10345(4) | 8164(2)  | 73(1)          |

|       |         |          |          |       |
|-------|---------|----------|----------|-------|
| C(15) | 1840(2) | 11679(3) | 11592(2) | 65(1) |
| C(1)  | 5501(2) | 9747(4)  | 7698(2)  | 77(1) |
| C(16) | 1044(2) | 11474(3) | 11499(2) | 67(1) |
| C(6)  | 5676(2) | 8531(4)  | 7819(2)  | 71(1) |
| C(22) | 2297(2) | 5623(3)  | 7911(2)  | 82(1) |

---

Table 3. Bond lengths [Å] and angles [deg] for **4a**.

---

|             |          |
|-------------|----------|
| O(4)-C(20)  | 1.380(3) |
| O(4)-C(18)  | 1.381(3) |
| C(11)-C(12) | 1.369(4) |
| C(11)-C(10) | 1.406(4) |
| C(11)-C(13) | 1.439(4) |
| N(1)-C(12)  | 1.356(4) |
| N(1)-C(9)   | 1.366(3) |
| N(1)-C(7)   | 1.477(4) |
| C(18)-C(17) | 1.374(4) |
| C(18)-C(13) | 1.384(4) |
| O(1)-C(20)  | 1.193(3) |
| O(3)-C(21)  | 1.300(4) |
| O(3)-C(22)  | 1.441(4) |
| C(10)-C(9)  | 1.396(4) |
| C(10)-C(20) | 1.445(4) |
| C(9)-C(21)  | 1.459(4) |
| C(13)-C(14) | 1.393(4) |
| C(7)-C(4)   | 1.501(4) |
| O(2)-C(21)  | 1.196(4) |
| C(5)-C(4)   | 1.380(4) |
| C(5)-C(6)   | 1.383(4) |
| C(4)-C(3)   | 1.380(4) |
| C(17)-C(16) | 1.371(5) |
| C(14)-C(15) | 1.374(4) |
| C(3)-C(2)   | 1.370(5) |
| C(2)-C(1)   | 1.360(5) |

|                   |          |
|-------------------|----------|
| C(15)-C(16)       | 1.371(5) |
| C(1)-C(6)         | 1.373(5) |
| C(20)-O(4)-C(18)  | 124.8(2) |
| C(12)-C(11)-C(10) | 107.3(2) |
| C(12)-C(11)-C(13) | 131.2(3) |
| C(10)-C(11)-C(13) | 121.5(2) |
| C(12)-N(1)-C(9)   | 110.3(2) |
| C(12)-N(1)-C(7)   | 121.3(3) |
| C(9)-N(1)-C(7)    | 128.3(3) |
| C(17)-C(18)-C(13) | 121.5(3) |
| C(17)-C(18)-O(4)  | 116.9(3) |
| C(13)-C(18)-O(4)  | 121.6(2) |
| C(21)-O(3)-C(22)  | 117.4(3) |
| C(9)-C(10)-C(11)  | 107.5(2) |
| C(9)-C(10)-C(20)  | 131.6(3) |
| C(11)-C(10)-C(20) | 120.6(3) |
| O(1)-C(20)-O(4)   | 115.1(3) |
| O(1)-C(20)-C(10)  | 129.7(3) |
| O(4)-C(20)-C(10)  | 115.1(3) |
| N(1)-C(9)-C(10)   | 106.6(2) |
| N(1)-C(9)-C(21)   | 121.1(3) |
| C(10)-C(9)-C(21)  | 132.3(3) |
| C(18)-C(13)-C(14) | 117.6(3) |
| C(18)-C(13)-C(11) | 116.2(3) |
| C(14)-C(13)-C(11) | 126.1(3) |
| N(1)-C(7)-C(4)    | 112.8(2) |
| N(1)-C(12)-C(11)  | 108.3(3) |
| C(4)-C(5)-C(6)    | 120.8(3) |
| C(3)-C(4)-C(5)    | 118.5(3) |
| C(3)-C(4)-C(7)    | 121.8(3) |



|                   |          |
|-------------------|----------|
| C(5)-C(4)-C(7)    | 119.6(3) |
| C(16)-C(17)-C(18) | 119.5(3) |
| C(15)-C(14)-C(13) | 121.0(3) |
| O(2)-C(21)-O(3)   | 122.1(3) |
| O(2)-C(21)-C(9)   | 124.8(3) |
| O(3)-C(21)-C(9)   | 113.0(3) |
| C(2)-C(3)-C(4)    | 120.8(3) |
| C(1)-C(2)-C(3)    | 120.0(4) |
| C(14)-C(15)-C(16) | 119.8(3) |
| C(2)-C(1)-C(6)    | 120.7(4) |
| C(17)-C(16)-C(15) | 120.5(3) |
| C(1)-C(6)-C(5)    | 119.1(4) |

---

Symmetry transformations used to generate equivalent atoms:

Table 4. Anisotropic displacement parameters ( $\text{Å}^2 \times 10^3$ ) for **4a**.

The anisotropic displacement factor exponent takes the form:

$$-2 \pi^2 [ h^2 a^{*2} U_{11} + \dots + 2 h k a^* b^* U_{12} ]$$

|       | U11   | U22   | U33    | U23    | U13    | U12    |
|-------|-------|-------|--------|--------|--------|--------|
| O(4)  | 30(1) | 56(1) | 62(1)  | -10(1) | 4(1)   | -1(1)  |
| C(11) | 34(2) | 44(2) | 37(2)  | 4(1)   | -1(1)  | 0(1)   |
| N(1)  | 28(1) | 55(2) | 49(2)  | 5(1)   | 2(1)   | 2(1)   |
| C(18) | 42(2) | 37(2) | 41(2)  | 1(1)   | 5(2)   | 1(2)   |
| O(1)  | 44(1) | 98(2) | 108(2) | -49(2) | 5(1)   | -20(1) |
| O(3)  | 64(2) | 88(2) | 88(2)  | -46(2) | -13(2) | 16(1)  |
| C(10) | 31(2) | 39(2) | 38(2)  | 2(1)   | 1(1)   | 0(1)   |
| C(20) | 36(2) | 51(2) | 56(2)  | -8(2)  | 6(2)   | -5(2)  |
| C(9)  | 33(2) | 41(2) | 42(2)  | 4(1)   | 7(2)   | 3(1)   |
| C(13) | 41(2) | 38(2) | 36(2)  | 4(1)   | 3(1)   | -1(1)  |
| C(7)  | 27(2) | 63(2) | 62(2)  | 14(2)  | 5(2)   | 10(2)  |
| O(2)  | 78(2) | 98(2) | 101(2) | -37(2) | -2(2)  | 34(2)  |
| C(12) | 36(2) | 57(2) | 44(2)  | -1(2)  | -5(2)  | -5(2)  |
| C(5)  | 40(2) | 70(2) | 56(2)  | 4(2)   | 0(2)   | 6(2)   |
| C(4)  | 25(2) | 52(2) | 49(2)  | 4(2)   | -4(1)  | -3(1)  |
| C(17) | 49(2) | 49(2) | 66(2)  | 7(2)   | 13(2)  | 8(2)   |
| C(14) | 59(2) | 52(2) | 47(2)  | 0(2)   | -3(2)  | -4(2)  |
| C(21) | 43(2) | 51(2) | 50(2)  | 0(2)   | 12(2)  | 6(2)   |
| C(3)  | 47(2) | 55(2) | 64(2)  | 3(2)   | -1(2)  | -3(2)  |

|       |       |        |       |        |        |        |
|-------|-------|--------|-------|--------|--------|--------|
| C(2)  | 65(3) | 69(2)  | 84(3) | 25(2)  | -13(2) | -21(2) |
| C(15) | 92(3) | 48(2)  | 55(2) | -11(2) | 11(2)  | -2(2)  |
| C(1)  | 48(2) | 117(4) | 65(3) | 33(3)  | -8(2)  | -34(2) |
| C(16) | 82(3) | 47(2)  | 72(3) | -3(2)  | 24(2)  | 13(2)  |
| C(6)  | 42(2) | 116(3) | 56(2) | 4(2)   | 6(2)   | -1(2)  |
| C(22) | 74(3) | 86(3)  | 85(3) | -42(2) | 6(2)   | -10(2) |

---

—

Table 5. Hydrogen coordinates ( $\times 10^4$ ) and isotropic displacement parameters ( $\text{\AA}^2 \times 10^3$ ) for **4a**.

|        | x    | y     | z     | U(eq) |
|--------|------|-------|-------|-------|
| H(7A)  | 4484 | 6975  | 9499  | 61    |
| H(7B)  | 4772 | 8036  | 10043 | 61    |
| H(12)  | 3796 | 9552  | 10542 | 54    |
| H(5)   | 5426 | 7091  | 8504  | 67    |
| H(17)  | 239  | 10458 | 10933 | 66    |
| H(14)  | 2917 | 11122 | 11254 | 63    |
| H(3)   | 4277 | 10155 | 9087  | 67    |
| H(2)   | 4862 | 11166 | 8074  | 87    |
| H(15)  | 2016 | 12288 | 11927 | 78    |
| H(1)   | 5742 | 10166 | 7292  | 92    |
| H(16)  | 681  | 11939 | 11777 | 80    |
| H(6)   | 6033 | 8126  | 7498  | 86    |
| H(22A) | 2701 | 5665  | 7522  | 122   |
| H(22B) | 1785 | 5624  | 7669  | 122   |
| H(22C) | 2360 | 4883  | 8206  | 122   |

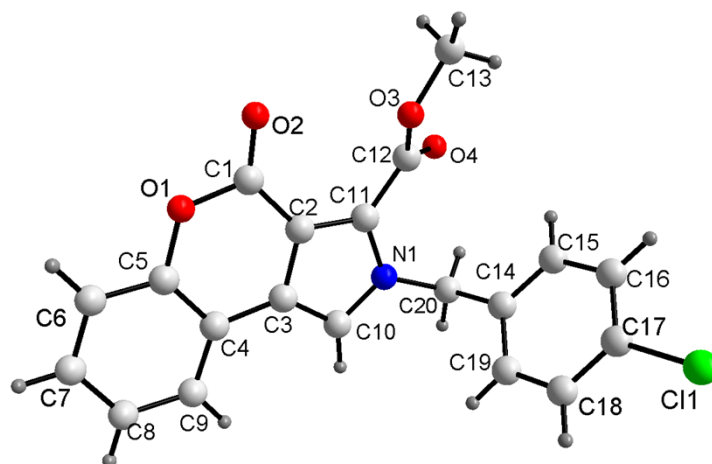

Table 1. Crystal data and structure refinement for **4o**.

|                                   |                                                                                                                                      |
|-----------------------------------|--------------------------------------------------------------------------------------------------------------------------------------|
| Identification code               | <b>4o</b>                                                                                                                            |
| Empirical formula                 | C <sub>20</sub> H <sub>14</sub> ClNO <sub>4</sub>                                                                                    |
| Formula weight                    | 367.77                                                                                                                               |
| Temperature                       | 296 K                                                                                                                                |
| Wavelength                        | 0.71073 Å                                                                                                                            |
| Crystal system, space group       | Triclinic, P-1                                                                                                                       |
| Unit cell dimensions              | a = 7.9547(15) Å    alpha = 85.276(5) deg.<br>b = 8.5268(16) Å    beta = 82.284(5) deg.<br>c = 14.076(3) Å    gamma = 63.553(5) deg. |
| Volume                            | 846.8(3) Å <sup>3</sup>                                                                                                              |
| Z, Calculated density             | 2, 1.442 Mg/m <sup>3</sup>                                                                                                           |
| Absorption coefficient            | 0.252 mm <sup>-1</sup>                                                                                                               |
| F(000)                            | 380                                                                                                                                  |
| Crystal size                      | 0.35 x 0.33 x 0.3 mm                                                                                                                 |
| Theta range for data collection   | 2.67 to 27.53 deg.                                                                                                                   |
| Limiting indices                  | -10 ≤ h ≤ 10, -11 ≤ k ≤ 11, -18 ≤ l ≤ 18                                                                                             |
| Reflections collected / unique    | 11386 / 3913 [R(int) = 0.0427]                                                                                                       |
| Completeness to theta = 27.53     | 97.4 %                                                                                                                               |
| Refinement method                 | Full-matrix least-squares on F <sup>2</sup>                                                                                          |
| Data / restraints / parameters    | 3814 / 0 / 236                                                                                                                       |
| Goodness-of-fit on F <sup>2</sup> | 1.012                                                                                                                                |
| Final R indices [I > 2σ(I)]       | R1 = 0.0556, wR2 = 0.1259                                                                                                            |
| R indices (all data)              | R1 = 0.1040, wR2 = 0.1447                                                                                                            |
| Largest diff. peak and hole       | 0.262 and -0.337 e.Å <sup>-3</sup>                                                                                                   |

Table 2. Atomic coordinates ( $\times 10^4$ ) and equivalent isotropic displacement parameters ( $\text{\AA}^2 \times 10^3$ ) for **4o**.

U(eq) is defined as one third of the trace of the orthogonalized  $U_{ij}$  tensor.

|       | x        | y       | z        | U(eq) |
|-------|----------|---------|----------|-------|
| Cl(1) | 13059(1) | -971(1) | 10399(1) | 76(1) |
| O(1)  | 6530(2)  | 2409(2) | 4762(1)  | 47(1) |
| C(4)  | 9785(3)  | 2000(3) | 4438(2)  | 38(1) |
| O(2)  | 4611(2)  | 3684(2) | 6026(1)  | 57(1) |
| O(3)  | 5450(2)  | 4321(2) | 7868(1)  | 55(1) |
| C(1)  | 6179(3)  | 3219(3) | 5619(2)  | 41(1) |
| C(3)  | 9508(3)  | 2839(3) | 5335(2)  | 37(1) |
| C(10) | 10648(3) | 3289(3) | 5788(2)  | 42(1) |
| N(1)  | 9656(2)  | 4129(2) | 6600(1)  | 40(1) |
| C(18) | 13351(3) | 410(3)  | 8638(2)  | 49(1) |
| C(19) | 12770(3) | 1707(3) | 7939(2)  | 47(1) |
| O(4)  | 6329(3)  | 6459(2) | 7819(2)  | 78(1) |
| C(6)  | 8303(4)  | 1113(3) | 3334(2)  | 51(1) |
| C(5)  | 8230(3)  | 1849(3) | 4183(2)  | 41(1) |
| C(14) | 11133(3) | 3248(3) | 8104(2)  | 40(1) |
| C(9)  | 11444(3) | 1353(3) | 3814(2)  | 48(1) |
| C(11) | 7869(3)  | 4201(3) | 6704(2)  | 40(1) |
| C(2)  | 7755(3)  | 3411(3) | 5911(2)  | 36(1) |
| C(20) | 10506(3) | 4619(3) | 7322(2)  | 46(1) |
| C(8)  | 11527(4) | 595(3)  | 2975(2)  | 55(1) |
| C(12) | 6488(3)  | 5132(3) | 7506(2)  | 45(1) |
| C(15) | 10137(3) | 3467(4) | 9000(2)  | 56(1) |
| C(7)  | 9959(4)  | 490(3)  | 2732(2)  | 55(1) |
| C(17) | 12322(4) | 670(3)  | 9513(2)  | 50(1) |
| C(16) | 10717(4) | 2185(4) | 9710(2)  | 62(1) |
| C(13) | 3991(4)  | 5222(4) | 8624(2)  | 64(1) |

Table 3. Bond lengths [Å] and angles [deg] for **4o**.

---

|                  |            |
|------------------|------------|
| Cl(1)-C(17)      | 1.743(3)   |
| O(1)-C(1)        | 1.373(3)   |
| O(1)-C(5)        | 1.383(2)   |
| C(4)-C(9)        | 1.392(3)   |
| C(4)-C(5)        | 1.395(3)   |
| C(4)-C(3)        | 1.444(3)   |
| O(2)-C(1)        | 1.202(2)   |
| O(3)-C(12)       | 1.326(3)   |
| O(3)-C(13)       | 1.442(3)   |
| C(1)-C(2)        | 1.449(3)   |
| C(3)-C(10)       | 1.372(3)   |
| C(3)-C(2)        | 1.413(3)   |
| C(10)-N(1)       | 1.353(3)   |
| N(1)-C(11)       | 1.383(3)   |
| N(1)-C(20)       | 1.474(3)   |
| C(18)-C(17)      | 1.359(3)   |
| C(18)-C(19)      | 1.376(3)   |
| C(19)-C(14)      | 1.386(3)   |
| O(4)-C(12)       | 1.196(3)   |
| C(6)-C(7)        | 1.373(3)   |
| C(6)-C(5)        | 1.378(3)   |
| C(14)-C(15)      | 1.375(3)   |
| C(14)-C(20)      | 1.498(3)   |
| C(9)-C(8)        | 1.373(3)   |
| C(11)-C(2)       | 1.383(3)   |
| C(11)-C(12)      | 1.467(3)   |
| C(8)-C(7)        | 1.378(4)   |
| C(15)-C(16)      | 1.380(4)   |
| C(17)-C(16)      | 1.368(4)   |
| C(1)-O(1)-C(5)   | 123.86(17) |
| C(9)-C(4)-C(5)   | 117.9(2)   |
| C(9)-C(4)-C(3)   | 125.9(2)   |
| C(5)-C(4)-C(3)   | 116.13(19) |
| C(12)-O(3)-C(13) | 115.34(18) |
| O(2)-C(1)-O(1)   | 116.17(19) |
| O(2)-C(1)-C(2)   | 128.5(2)   |
| O(1)-C(1)-C(2)   | 115.36(18) |
| C(10)-C(3)-C(2)  | 107.12(19) |
| C(10)-C(3)-C(4)  | 132.7(2)   |

|                   |            |
|-------------------|------------|
| C(2)-C(3)-C(4)    | 120.18(18) |
| N(1)-C(10)-C(3)   | 108.50(18) |
| C(10)-N(1)-C(11)  | 109.90(18) |
| C(10)-N(1)-C(20)  | 123.21(17) |
| C(11)-N(1)-C(20)  | 126.21(19) |
| C(17)-C(18)-C(19) | 119.2(2)   |
| C(18)-C(19)-C(14) | 121.2(2)   |
| C(7)-C(6)-C(5)    | 119.1(2)   |
| C(6)-C(5)-O(1)    | 115.7(2)   |
| C(6)-C(5)-C(4)    | 121.6(2)   |
| O(1)-C(5)-C(4)    | 122.7(2)   |
| C(15)-C(14)-C(19) | 118.0(2)   |
| C(15)-C(14)-C(20) | 121.9(2)   |
| C(19)-C(14)-C(20) | 120.1(2)   |
| C(8)-C(9)-C(4)    | 120.4(2)   |
| C(2)-C(11)-N(1)   | 106.63(18) |
| C(2)-C(11)-C(12)  | 132.96(19) |
| N(1)-C(11)-C(12)  | 120.20(19) |
| C(11)-C(2)-C(3)   | 107.83(18) |
| C(11)-C(2)-C(1)   | 130.3(2)   |
| C(3)-C(2)-C(1)    | 121.8(2)   |
| N(1)-C(20)-C(14)  | 111.67(16) |
| C(9)-C(8)-C(7)    | 120.5(2)   |
| O(4)-C(12)-O(3)   | 123.1(2)   |
| O(4)-C(12)-C(11)  | 124.3(2)   |
| O(3)-C(12)-C(11)  | 112.65(19) |
| C(14)-C(15)-C(16) | 121.4(2)   |
| C(6)-C(7)-C(8)    | 120.5(2)   |
| C(18)-C(17)-C(16) | 121.5(2)   |
| C(18)-C(17)-Cl(1) | 119.2(2)   |
| C(16)-C(17)-Cl(1) | 119.3(2)   |
| C(17)-C(16)-C(15) | 118.8(2)   |

---

Symmetry transformations used to generate equivalent atoms:



Table 4. Anisotropic displacement parameters ( $\text{\AA}^2 \times 10^3$ ) for **4o**.  
 The anisotropic displacement factor exponent takes the form:  
 $-2 \pi^2 [ h^2 a^{*2} U_{11} + \dots + 2 h k a^* b^* U_{12} ]$

|       | U11   | U22   | U33    | U23    | U13    |        |
|-------|-------|-------|--------|--------|--------|--------|
| Cl(1) | 84(1) | 90(1) | 61(1)  | 13(1)  | -19(1) | -44(1) |
| O(1)  | 34(1) | 59(1) | 53(1)  | -3(1)  | -6(1)  | -24(1) |
| C(4)  | 32(1) | 36(1) | 44(1)  | 7(1)   | -5(1)  | -14(1) |
| O(2)  | 31(1) | 80(1) | 64(1)  | -9(1)  | 0(1)   | -28(1) |
| O(3)  | 56(1) | 65(1) | 55(1)  | -14(1) | 11(1)  | -38(1) |
| C(1)  | 31(1) | 43(1) | 49(1)  | 5(1)   | -7(1)  | -17(1) |
| C(3)  | 28(1) | 37(1) | 46(1)  | 8(1)   | -5(1)  | -15(1) |
| C(10) | 29(1) | 46(1) | 51(1)  | 1(1)   | -2(1)  | -18(1) |
| N(1)  | 30(1) | 40(1) | 53(1)  | -1(1)  | -7(1)  | -18(1) |
| C(18) | 41(1) | 45(1) | 54(2)  | -11(1) | -5(1)  | -13(1) |
| C(19) | 39(1) | 54(2) | 46(1)  | -12(1) | 2(1)   | -19(1) |
| O(4)  | 58(1) | 57(1) | 120(2) | -39(1) | 29(1)  | -31(1) |
| C(6)  | 52(2) | 55(2) | 51(2)  | 2(1)   | -10(1) | -27(1) |
| C(5)  | 36(1) | 41(1) | 45(1)  | 5(1)   | -3(1)  | -17(1) |
| C(14) | 32(1) | 46(1) | 50(1)  | -13(1) | -2(1)  | -22(1) |
| C(9)  | 39(1) | 49(1) | 56(2)  | 4(1)   | -1(1)  | -20(1) |
| C(11) | 27(1) | 36(1) | 55(1)  | 3(1)   | -3(1)  | -13(1) |
| C(2)  | 28(1) | 36(1) | 46(1)  | 5(1)   | -6(1)  | -15(1) |
| C(20) | 35(1) | 45(1) | 63(2)  | -10(1) | -2(1)  | -23(1) |
| C(8)  | 51(2) | 52(2) | 52(2)  | -1(1)  | 5(1)   | -18(1) |
| C(12) | 32(1) | 42(1) | 60(2)  | -4(1)  | -6(1)  | -15(1) |
| C(15) | 39(1) | 62(2) | 59(2)  | -18(1) | 5(1)   | -14(1) |
| C(7)  | 61(2) | 54(2) | 47(2)  | -4(1)  | -2(1)  | -24(1) |
| C(17) | 49(1) | 62(2) | 47(1)  | -4(1)  | -7(1)  | -31(1) |
| C(16) | 51(2) | 83(2) | 48(2)  | -12(2) | 9(1)   | -26(2) |
| C(13) | 57(2) | 88(2) | 54(2)  | -19(2) | 13(1)  | -42(2) |

Table 5. Hydrogen coordinates ( $\times 10^4$ ) and isotropic displacement parameters ( $\text{\AA}^2 \times 10^3$ ) for **4o**.

|        | x     | y    | z     | U(eq) |
|--------|-------|------|-------|-------|
| H(10)  | 11919 | 3050 | 5569  | 50    |
| H(18)  | 14457 | -653 | 8511  | 58    |
| H(19)  | 13504 | 1543 | 7332  | 56    |
| H(6)   | 7224  | 1038 | 3167  | 61    |
| H(9)   | 12527 | 1438 | 3969  | 58    |
| H(20A) | 9571  | 5745 | 7605  | 55    |
| H(20B) | 11605 | 4789 | 7007  | 55    |
| H(8)   | 12672 | 139  | 2559  | 66    |
| H(15)  | 9025  | 4524 | 9132  | 68    |
| H(7)   | 10024 | -17  | 2144  | 66    |
| H(16)  | 10015 | 2351 | 10326 | 75    |
| H(13A) | 4536  | 5552 | 9113  | 95    |
| H(13B) | 3440  | 4448 | 8916  | 95    |
| H(13C) | 3006  | 6278 | 8358  | 95    |
